# Localizing post-admixture adaptive variants with object detection on ancestry-painted chromosomes

Iman Hamid<sup>1</sup>, Katharine L. Korunes<sup>1</sup>, Daniel R. Schrider<sup>2</sup>, Amy Goldberg<sup>1,\*</sup>

<sup>1</sup>Department of Evolutionary Anthropology, Duke University, Durham, North Carolina, USA

<sup>2</sup>Department of Genetics, University of North Carolina, Chapel Hill, North Carolina, USA

\*Correspondence: amy.goldberg@duke.edu

**Abstract:** Gene flow between previously isolated populations during the founding of an admixed or hybrid population has the potential to introduce adaptive alleles into the new population. If the adaptive allele is common in one source population, but not the other, then as the adaptive allele rises in frequency in the admixed population, genetic ancestry from the source containing the adaptive allele will increase nearby as well. Patterns of genetic ancestry have therefore been used to identify post-admixture positive selection in humans and other animals, including examples in immunity, metabolism, and animal coloration. A common method identifies regions of the genome that have local ancestry 'outliers' compared to the distribution across the rest of the genome, considering each locus independently. However, we lack theoretical models for expected distributions of ancestry under various demographic scenarios, resulting in potential false positives and false negatives. Further, ancestry patterns between distant sites are often not independent. As a result, current methods tend to infer wide genomic regions containing many genes as under selection, limiting biological interpretation. Instead, we develop a deep learning object detection method applied to images generated from local ancestry-painted genomes. This approach preserves information from the surrounding genomic context and avoids potential pitfalls of user-defined summary statistics. We find the method is robust to a variety of demographic misspecifications using simulated data. Applied to human genotype data from Cabo Verde, we localize a known adaptive locus to a single narrow region compared to multiple or long windows obtained using two other ancestry-based methods.

## 32 Introduction

33 Genetic exchange between previously separated populations is ubiquitous across species (Moran et  
34 al., 2021; Payseur & Rieseberg 2016), often referred to as ‘admixture’ or ‘hybridization’ when moderate- to  
35 large-scale movements of individuals create new populations with ancestors from multiple source populations.  
36 In admixed populations, genetic ancestry varies between individuals and along the chromosome within  
37 individuals (Aguillon et al., 2022; Gopalan et al., 2022; Hellenthal et al., 2014). Across the tree of life, variation  
38 in genetic ancestry shapes genetic and phenotypic variation, such as differences in disease risk between  
39 populations. Small amounts of gene flow or larger admixture may introduce advantageous alleles which then  
40 undergo positive selection. Such cases have been identified in diverse taxa, often termed adaptive  
41 introgression (Aguillon et al., 2022; Edelman & Mallet 2021; Hedrick, 2013; Hsieh et al., 2019; Huerta-Sánchez  
42 et al., 2014; Moran et al., 2021; Norris et al., 2015; Oziolor et al., 2019; Racimo et al., 2015; Whitney et al.,  
43 2006) or, in humans, post-admixture positive selection (Cuadros-Espinoza et al., 2022; Gopalan et al., 2022;  
44 Tang et al., 2007).

45 Despite the ubiquity and biological importance of admixture, understanding evolutionary processes in  
46 admixed populations remains challenging (Gopalan et al., 2022; Moran et al., 2021). Classical methods to  
47 detect selection may pick up signatures of pre-admixture selection, and are often confounded by the process of  
48 admixture, which can increase linkage disequilibrium (LD) and change the distribution of allele frequencies  
49 (Cuadros-Espinoza et al., 2022; Lohmueller et al., 2010, 2011; Yelman et al., 2021). Yet, because admixture  
50 can introduce advantageous alleles at intermediate frequencies, post-admixture selection provides an  
51 opportunity for particularly rapid adaptation on the scale of tens or hundreds of generations (Hellenthal et al.,  
52 2016; Hamid et al., 2021). Thus, methods tailored to the genetic signatures of admixed populations are  
53 important to investigate the extent and impact of post-admixture adaptation across many organisms.

54 Recent methods have advanced our ability to identify regions of admixed genomes containing  
55 haplotypes under positive selection by using patterns of genetic ancestry. When one source population  
56 provides a beneficial allele, we expect that, as the beneficial allele increases in frequency, linked alleles from  
57 the source population will hitchhike along with it, and thereby the proportion of admixed individuals with  
58 ancestry from that source population at the selected locus (i.e. the local ancestry proportion) increases too.  
59 This logic has been leveraged to detect selection in recently admixed populations by identifying outliers in local  
60 ancestry proportion compared to a genome-wide average. Applied to human populations, variations on  
61 ancestry outlier detection have identified genomic regions associated with a range of phenotypic traits  
62 potentially underlying adaptation, including response to high altitude, diet, pigmentation, immunity, and disease  
63 susceptibility (Bryc et al., 2010; Bryc et al., 2015; Busby et al., 2016; Busby et al., 2017; Cuadros-Espinoza et  
64 al., 2022; Fernandes et al., 2019; Hamid et al., 2021; Isshiki et al., 2021; Jeong et al., 2014; Jin et al., 2012;  
65 Laso-Jadart et al., 2017; Lopez et al., 2019; Norris et al., 2020; Patin et al., 2017; Pierron et al., 2018;  
66 Rishishwar et al., 2015; Tang et al., 2007; Triska et al., 2015; Vicuña et al., 2020; Zhou et al., 2016).

67 This ancestry outlier detection approach is useful for identifying regions that may be under selection,  
68 but it can yield false positives due to long-range LD from the source populations or allele frequencies drifting as  
69 a result of serial founder effects, and the criteria for determining outliers is difficult (Bhatia et al., 2014; Buby et  
70 al., 2017; Price et al., 2008); false negatives may also occur if the number of true adaptive events is greater  
71 than the number of outliers retained. Importantly, the ancestry outlier approach discards the wealth of  
72 information from the surrounding genomic context. Along-genome spatial patterns of ancestry, such as the  
73 distribution of ancestry tract lengths containing a selected locus, may be informative about selection on this  
74 timescale in admixed populations. The length of ancestry tracts is influenced by the timing and strength of  
75 selection, analogous to the increase in LD around selective sweeps in homogeneous populations (Kelley 1997;

76 Kim & Nielsen, 2004; Sabeti et al., 2002; Voight et al., 2006). Similarly, strong selection can influence ancestry  
77 patterns along long stretches of the genome, often in complex patterns depending on the evolutionary scenario  
78 (Hamid et al., 2021; Shchur et al., 2020; Svedberg et al., 2021 ). For example, Svedberg et al. 2021 extend  
79 their prior model (Ancestry\_HMM, Corbett-Detig & Nielsen 2017) to explicitly incorporate post-admixture  
80 selection by modeling increased ancestry frequency at the selected allele and a longer introgressed haplotype.  
81 We used similar expected signatures summarized in the *iDAT* statistic developed in Hamid et al. 2021.  
82 However, the expected distributions of the length and frequency of ancestry tracts surrounding post-admixture  
83 positively selected alleles has been difficult to explore theoretically, particularly combined with variable  
84 demographic histories (with the notable exception of Shchur et al. 2020).

85 However, information about the complex patterns of ancestry around a selected locus is lost when  
86 relying on summary statistics, and there is a bias inherent in the user's choice of quantitative summaries to  
87 include during inference. More generally, we lack theoretical expectations for patterns of ancestry expected  
88 under post-admixture selection, especially under a range of selective and demographic histories.

89 To overcome the loss of spatial information along the genome and the simplifying assumptions of  
90 classical summary statistics, deep learning techniques have been increasingly used in population genetics.  
91 Deep learning algorithms are multi-layered networks trained on example datasets with known response  
92 variables with the goal of learning a relationship between the input data and output variable(s) (applications to  
93 population genetics reviewed in Schrider & Kern (2018)). Deep learning techniques are flexible with respect to  
94 data type and the specific task at hand, and have been shown to be effective for inferring demographic  
95 histories (Flagel et al., 2019; Sanchez et al., 2021; Sheehan & Song, 2016; Wang et al., 2021), recombination  
96 rates (Adrión et al., 2020; Chan et al., 2018; Flagel et al., 2019), and natural selection (Gower et al., 2021;  
97 Kern & Schrider, 2018; Sheehan & Song, 2016). Among the branches of deep learning, computer vision  
98 methods are a family of techniques originally developed to recognize images by using convolutional neural  
99 networks (CNNs) (Krizhevsky et al., 2012; LeCun et al., 2015; Lecun & Bengio, 1995). CNNs learn from  
100 complex spatial patterns in large datasets through a series of filtering and down sampling operations that  
101 compress the data into features that are informative for inference. CNNs have recently been applied to images  
102 of genotype matrices for population genetic inference with great success (Battey et al., 2020; Battey et al.,  
103 2021; Blischak et al., 2021; Chan et al., 2018; Flagel et al., 2019; Gower et al., 2021; Isildak et al., 2021;  
104 Sanchez et al., 2021; Torada et al., 2019). In doing so, researchers can circumvent the loss of information and  
105 bias from using user-defined population genetic summary statistics and make inferences for study systems and  
106 questions for which we lack theoretical expectations. Simulation-based inference is also often flexible enough  
107 that one may be able to incorporate various demographic histories into models, which has proven difficult for  
108 theoretical models.

109 Here, we build on recent successes in deep learning applications to population genetics problems and  
110 develop a deep learning object detection strategy that localizes genomic regions under selection from images  
111 of chromosomes 'painted' by ancestry (Figure 1) (Lawson et al., 2012; Maples et al., 2012). In using local  
112 ancestry rather than the genotypes directly, we focus on post-admixture processes and are potentially well-  
113 suited to low coverage or sparse SNP data common in non-model systems (Schaefer et al., 2016; Schaefer et  
114 al., 2017; Schumer et al., 2020; Wall et al., 2016). Using this approach, we demonstrate that complex ancestry  
115 patterns beyond single-locus summary statistics are informative about selection in recently admixed  
116 populations. We take advantage of existing deep learning object detection frameworks, illustrating the ease of  
117 use and accessibility of deep learning applications for population genetic researchers without experience in  
118 machine learning techniques. In simulated as well as human SNP data, we show that our method is able to  
119 localize regions under positive selection post admixture, and remains effective at identifying selection under a  
120 range of demographic misspecifications. We focus on scenarios with moderate to high admixture contributions

121 occurring in the last tens to hundreds of generations; multiple other methods have recently been developed  
122 focused on older admixture scenarios at low admixture contribution rates, often termed adaptive introgression  
123 (Gower et al., 2021; Racimo et al., 2017; Setter et al., 2020; Svedberg et al., 2021).

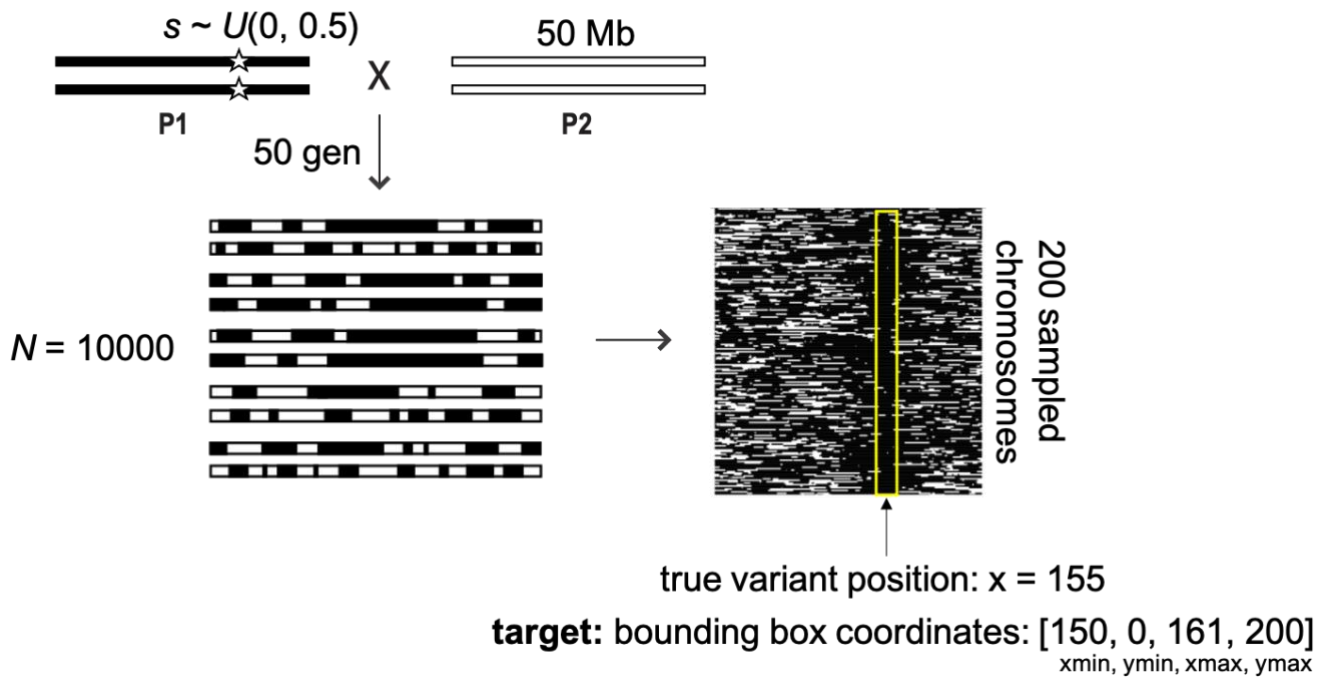

125  
126 **Figure 1.** Schematic of our baseline simulation scenario. Image input for the object detection model is  
127 generated by sampling 200 ancestry-painted chromosomes from a simulated admixed population. Rows  
128 represent individuals, with chromosome position along columns. Training samples have a known “target”  
129 bounding box (yellow box), spanning an 11-pixel window centered on the position of the known beneficial  
130 variant. Using training examples, the object detection model learns the complex patterns of ancestry indicative  
131 of positive selection post-admixture and uses this information to localize a beneficial variant to a small genomic  
132 region. The trained object detection model is then expected to output bounding boxes that contain variants  
133 under selection.

## Results

### Baseline Model Performance

We first describe the object detection method's performance in a baseline simulated scenario, before exploring the effects of model misspecification and finally comparing the method to other approaches. Full details on simulations, image generation, model training, and performance metrics are in Materials and Methods. Briefly, in the baseline scenario, we simulated a single-pulse admixture event between two isolated source populations. One source population was fixed for a beneficial variant randomly placed along the 50 Mb chromosome tract, with positive selection strength post admixture drawn from a uniform distribution  $s \sim U(0, 0.5)$ . For each simulation, we generated two images representing two types of genetic data that a user may be analyzing: one with full local ancestry (the high resolution scenario) representing whole-genome, high-density SNP, or similar data, and the second scenario with only 100 ancestry informative markers (AIMs, the low resolution scenario) in the 50 Mb. We then trained and validated the method for each of these two sets of images. Performance metrics included precision and recall (P-R), the proportion of inferred bounding boxes that contain the true selected variant, the average width of the inferred bounding boxes, and the average number of inferred bounding boxes per image.

Overall, the locus simulated to be under positive selection was contained within the inferred bounding box ~95% of the time in both the full ancestry (high resolution) and low-resolution scenarios (Table 1 & Figure 2). As expected, the high-resolution ancestry scenario had higher precision and recall across the range of detection thresholds (Figure 2), though both had P-R curves well above a no-skill (random) classifier.

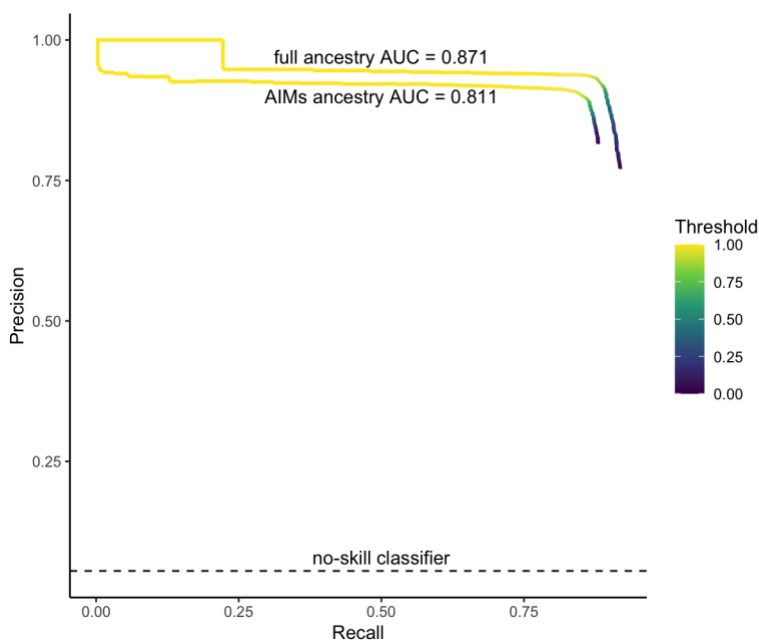

**Figure 2.** Precision-Recall curves for high (full) and low (AIMs) ancestry resolution images across a range of detection thresholds. Area under the curve (AUC) is calculated for the two scenarios, with the no-skill classifier indicated by the dashed black line.

165

**Table 1.** Performance of object detection method on images with high and low ancestry resolution.

| ancestry resolution  | bbox detection rate | average width                        | average number of bounding boxes     | precision | recall | AUC   |
|----------------------|---------------------|--------------------------------------|--------------------------------------|-----------|--------|-------|
| high (full ancestry) | 0.950               | 10.830<br>(var = 0.615,<br>n = 1978) | 1.027<br>(var = 0.063,<br>n = 2000)  | 0.886     | 0.897  | 0.871 |
| low (100 AIMs)       | 0.950               | 10.834<br>(var = 0.580,<br>n = 1964) | 1.0175<br>(var = 0.064,<br>n = 2000) | 0.867     | 0.870  | 0.811 |

166

167

168

### Model Misspecification

169

170

171

172

173

174

175

176

177

178

179

180

181

Often, we do not know the full model and parameters of a population's history. We tested the robustness of our method to several demographic model misspecifications, performing inference based on images generated from simulations that differed in model and/or parameter from the ones used to generate training images. Generally, we followed the high-resolution full ancestry baseline scenario described above and in the Materials and Methods, and altered one aspect of the admixed population's history for each scenario. We separately altered parameters for the admixture proportion, the number of generations since admixture occurred, as well as different models of the population size trajectory (bottleneck with a return to original size, expansion, or contraction). We also considered a scenario in which both source populations have the beneficial mutation segregating at a frequency of 0.5 at the time of admixture (i.e.  $F_{ST} = 0$  between the source populations at this allele) (see also Gopalan et al., 2022 for post-admixture positive selection simulations under different  $F_{ST}$  values between sources at the adaptive locus)

182

183

184

185

186

187

188

That is, we trained the model once under the baseline scenario, and then conducted inference on simulated versions that represent empirical data under different evolutionary scenarios. We then evaluated performance using the same set of metrics as described above for the baseline model, presented in Table 2 & Figure S1. Under these demographic misspecifications, the model was still able to detect 80-98% of variants under selection, except in two scenarios where the impact of selection on patterns of local ancestry is expected to be very weak or entirely absent (Table 2).

189

190

191

192

193

194

195

196

197

First, the model underperforms when contributing ancestry proportions was varied such that we inferred from images generated under an admixture scenario with 90% ancestral contribution from the source population providing the beneficial allele ( $m = 0.9$ ). In this scenario the method has difficulty detecting regions under selection resulting in a high rate of false negatives (Figure S1A) because, even in regions unaffected by selection, the image is primarily one color by the end of 50 generations. We do not see this effect in the opposite scenario involving 10% ancestral contribution from the source population providing the beneficial allele ( $m = 0.1$ ). In this scenario, the beneficial allele increasing in frequency results in the "minor" image color increasing specifically around that region.

198

199

200

Second, the model also underperforms when the two source populations carry the beneficial allele at the same frequency ( $F_{ST} = 0$ ). The performance of the model under this misspecification follows the no-skill classifier (Figure S1D), suggesting the model is randomly assigning bounding boxes. In this case, the model is

unable to detect any ancestry-based patterns of selection because both ancestries are being equally selected. We have previously suggested and demonstrated this same result with other ancestry-based signatures of selection (Gopalan et al., 2022; Hamid et al., 2021).

**Table 2.** Performance of object detection method on images generated from demographic misspecifications. Further details of models in Materials and Methods, Figure S1. The two scenarios that perform poorly are marked (\*).

| misspecification | bbox detection rate | average width                        | average number of bounding boxes    | precision | recall | AUC   |
|------------------|---------------------|--------------------------------------|-------------------------------------|-----------|--------|-------|
| none (baseline)  | 0.950               | 10.830<br>(var = 0.615,<br>n = 1978) | 1.027<br>(var = 0.063,<br>n = 2000) | 0.886     | 0.897  | 0.871 |
| m = 0.1          | 0.767               | 10.771<br>(var=0.850,<br>n = 774)    | 0.787<br>(var = 0.198,<br>n=1000)   | 0.942     | 0.734  | 0.743 |
| m = 0.25         | 0.885               | 10.838<br>(var=0.619,<br>n = 906)    | 0.953<br>(var = 0.181,<br>n = 1000) | 0.912     | 0.851  | 0.860 |
| m = 0.75         | 0.846               | 10.795<br>(var = 0.683,<br>n = 876)  | 0.881<br>(var = 0.115,<br>n = 1000) | 0.875     | 0.765  | 0.731 |
| m = 0.9*         | 0.082               | 10.763<br>(var = 0.277,<br>n = 213)  | 0.213<br>(var = 0.168,<br>n = 1000) | 0.342     | 0.073  | 0.044 |
| gen = 25         | 0.874               | 10.824<br>(var = 0.624,<br>n = 959)  | 0.995<br>(var = 0.087,<br>n = 1000) | 0.814     | 0.799  | 0.771 |
| gen = 100        | 0.977               | 10.777<br>(var = 0.837,<br>n = 996)  | 1.013<br>(var = 0.025,<br>n = 1000) | 0.914     | 0.918  | 0.884 |
| Fst = 0*         | 0.046               | 10.879<br>(var = 0.287,<br>n = 717)  | 1.262<br>(var = 1.173,<br>n = 1000) | 0.054     | 0.057  | 0.015 |
| bottleneck (50%) | 0.953               | 10.858<br>(var = 0.498,<br>n = 995)  | 1.046<br>(var = 0.092,<br>n = 1000) | 0.872     | 0.895  | 0.860 |
| bottleneck (10%) | 0.939               | 10.846<br>(var = 0.544,<br>n = 990)  | 1.021<br>(var = 0.047,<br>n = 1000) | 0.860     | 0.870  | 0.836 |

|             |       |                                     |                                     |       |       |       |
|-------------|-------|-------------------------------------|-------------------------------------|-------|-------|-------|
| expansion   | 0.945 | 10.809<br>(var = 0.700,<br>n = 981) | 1.017<br>(var = 0.063,<br>n = 1000) | 0.887 | 0.889 | 0.865 |
| contraction | 0.944 | 10.881<br>(var = 0.403,<br>n = 987) | 1.042<br>(var = 0.088,<br>n = 1000) | 0.864 | 0.883 | 0.852 |

## Performance on neutrally evolving chromosomes

Thus far, we have tested performance on positive examples (i.e. simulated chromosomes with a positively selected variant); here we consider negative examples where the correct inference would be that there are no regions under selection. Our method as described above is flexible enough to infer 0, 1, or multiple bboxes. However, we did not initially provide any negative examples in our training, which may impact performance for a truly neutrally evolving chromosome. First, we test our current model performance on simulated negative examples, then we train a new model including such examples.

First, we generated 1000 full ancestry images for neutrally evolving chromosomes generated under our baseline demographic model. We performed inference using our originally trained full ancestry model without training on neutral images. At a detection threshold (“bbox score”) of 0.5, our standard setting, the model predicted no bbox for 26.5% of images (see Materials and Methods for an explanation of the detection threshold parameter). For the remaining 73.5% of images, the average bbox score is 0.660, indicating overall low confidence in the predictions. If we increase the detection threshold to a bbox score of 0.7, the model predicted no bbox for 63.2% of images. If we increase the detection threshold to a bbox score of 0.9, the model predicts no bbox for 94.9% of images. For comparison, on the original validation set, the average bbox score is 0.972. To summarize, by increasing the detection threshold, one can weed out low confidence predictions and have high accuracy on neutrally evolving chromosomes.

Next, we train our model including neutral simulations (“negative examples”) to understand the potential benefits of more tailored training sets. We trained a random subset of our original training images but included neutral images as well (training set = 800 total images [640 selection images, 160 neutral images], validation set = 200 total images [180 selection, 40 neutral]). Then, we tested the newly trained model on the remaining 800 neutral images. We find that of these, 797 (>99%) accurately predict no variant under selection (meaning no bounding boxes are predicted), while 3 (0.375%) predict a variant under selection even at a detection threshold of 0.5 (model default, but relatively low confidence). When we increased the detection threshold to 0.75 to include only high confidence predictions, 100% of the neutral simulations were correctly predicted to have no bboxes.

Accuracy on selected images (n=9180) remains high in this newly trained model with 90.8% of predicted bounding boxes containing a selected variant (precision: 0.904, recall 0.828 at a detection threshold of 0.5). This is trained on a much smaller dataset than the original model, which explains the slightly lower overall performance.

## Performance on chromosomes with multiple selected variants

We primarily considered scenarios with a single locus under selection, yet depending on the window size considered, there may be multiple sites under selection. There are many complex scenarios that one



could possibly test based on combinations of the number of loci across various selection strengths at different spacing between variants. In order to gain a general intuition for the model performance in scenarios where multiple sites are hypothesized to be under selection, we consider a simple example and outline a possible solution to improve performance in similar cases.

If multiple selected sites are in close proximity, their ancestry signals may interfere with one another, and the model may have difficulty distinguishing the signals resulting in the model predicting a broad region or a region between the two sites to be under selection. If one site has undergone much stronger selection than the other, the model may only confidently identify the stronger signal. As a simple example, we generated 10 images with two sites under equal selection strengths ( $s=0.05$  for both sites). We generated a large chromosome (250 Mb, roughly the size of human chromosome 1), and placed the selected variants near opposite ends of the chromosome so their signals would not interfere with one another; variant 1: 10% of the chromosome length (physical position = 25 Mb); variant 2: 90% of the chromosome length (225 Mb). Both variants were fixed in ancestral population 1 and absent in ancestral population 2, so that the selection signal would come from the same ancestry for both sites. The demographic scenario followed our baseline trained model. The model, which was trained with a single positively-selected locus, correctly picked out at least one selected variant for 10 out of 10 images. The model was able to identify both selected variants for 5 out of the 10 images.

Alternatively, if one wanted to use the model pre-trained with a single selected locus, and reasonably suspected multiple sites were under selection, one could consider splitting large chromosomes into smaller chunks in order to pick up multiple sites. To test this scenario, we split the 10 chromosomes from the example above in half to generate two separate images, each containing only one selected variant. In this case, the model was able to detect the selected variants for 100% of images.

### Comparison to ancestry outlier detection

We next sought to evaluate whether our method constitutes an improvement on the most commonly used method for detecting regions under selection for admixed populations. The 'local ancestry outlier' approach identifies regions that deviate from the genome-wide average ancestry proportion, which are hypothesized to be enriched for regions under selection (Bryc et al., 2010; Gopalan et al., 2022; Tang et al., 2007). We compared performance between ancestry outlier detection and our method by calculating precision and recall, including over a range of selection coefficients (Table 3 & Figure 3B-E). For each genomic window, we additionally calculated the proportion of simulations that were classified as being "under selection" at that region as a measure of localization ability (Figure 3A). The local ancestry approach has much lower precision resulting from increased false positives, even in scenarios with greater selection strength (Table 3 & Figure 3B&C). This is further visualized in Figure 3A, where the object detection method detects a narrower region under selection (~3 Mb) compared to the local ancestry outlier approach (~8 Mb). The width of the inferred region in object detection is highly determined by the bbox size in training data, as well as window length and input image size so it is likely possible to narrow the inferred region further.

**Table 3.** Performance of object detection and local ancestry outlier methods.

| method | bbox detection rate | average width | average number of bounding boxes | precision | recall |
|--------|---------------------|---------------|----------------------------------|-----------|--------|
|--------|---------------------|---------------|----------------------------------|-----------|--------|

|                        |       |                                     |                                     |       |       |
|------------------------|-------|-------------------------------------|-------------------------------------|-------|-------|
| object detection       | 0.948 | 10.990<br>(var = 0.002,<br>n = 990) | 1.037<br>(var = 0.092,<br>n = 1000) | 0.875 | 0.890 |
| local ancestry outlier | -     | -                                   | -                                   | 0.542 | 0.901 |

293

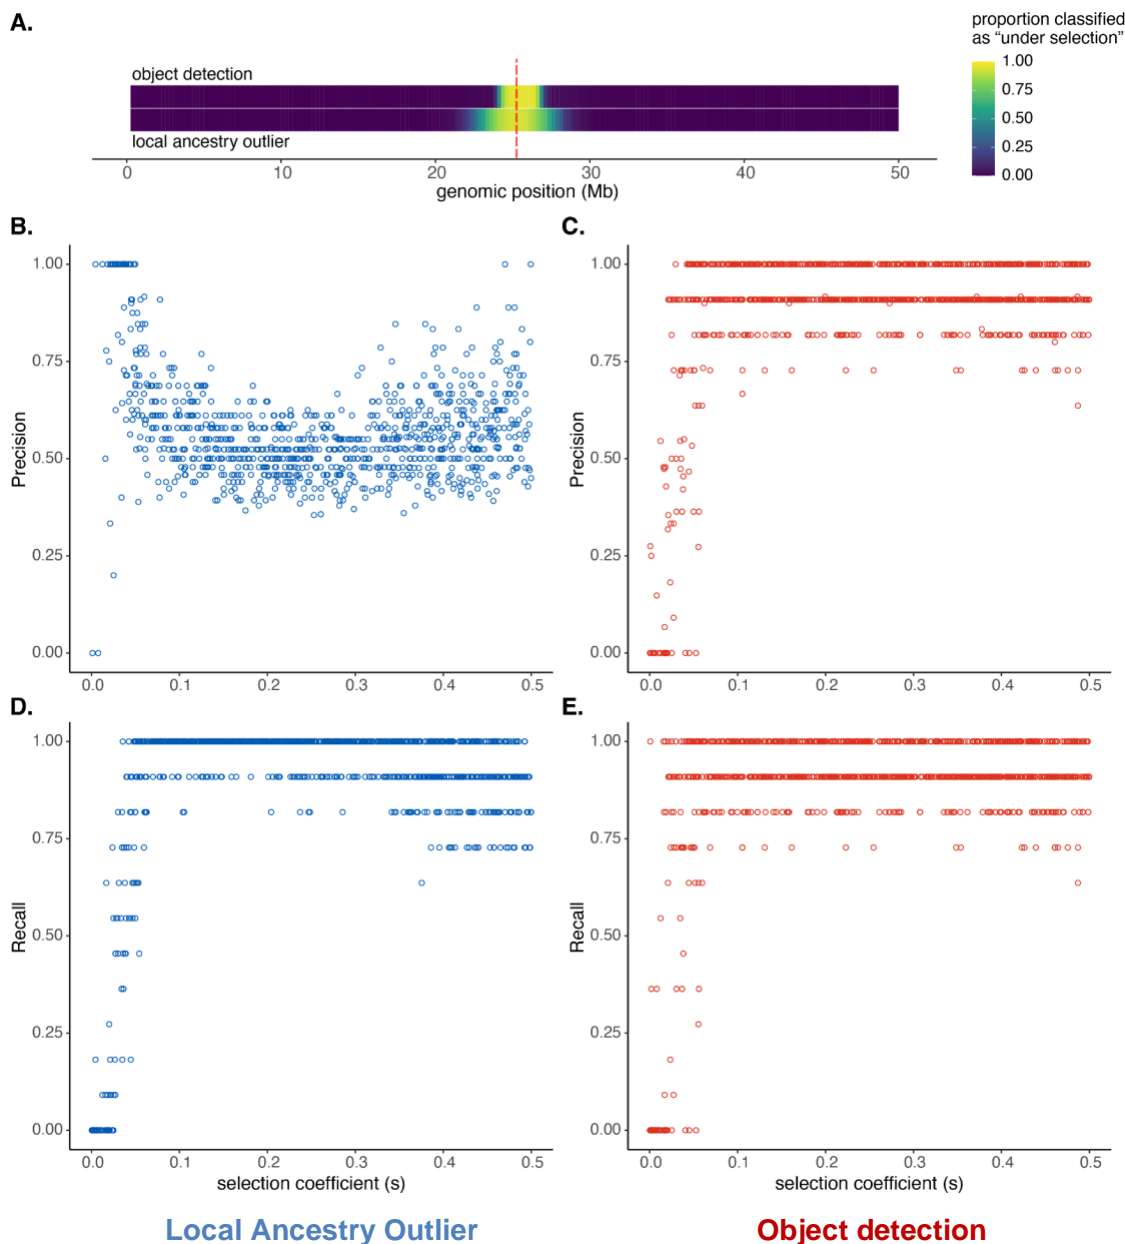

294

295

296

297

298

299

300

301

302

303

304

**Figure 3.** Comparison of local ancestry outlier approach and object detection method. A) Heatmap showing, for each genomic window, the proportion of simulations that had that region classified as "under selection" by either the object detection (top) or local ancestry outlier (bottom) methods. The position of the true selected variant is indicated by the vertical dashed red line. Precision across a range of selection coefficients (s) for the B) local ancestry outlier approach and C) the object detection method. Recall across a range of selection coefficients (s) for the D) local ancestry outlier approach and E) object detection method. (Also see Figures S2 and S3.)

## Application to human genotype data from Cabo Verde

We next tested the object detection method on human genotype data from the admixed population of Santiago, Cabo Verde using genotype data from 172 individuals at ~800k SNPs genome-wide (Beleza et al., 2013). We previously showed multiple lines of evidence for adaptation in this dataset at the Duffy-null that is protective against *P. vivax* malaria, including ancestry outlier detection and a statistic that incorporates the length of tracts as well as their frequency, *iDAT*; this allele is common in African ancestry and rare in Portuguese ancestry (Hamid et al., 2021). This locus has been a candidate for post-admixture positive selection in multiple other populations as well (Busby et al., 2017; Fernandes et al., 2019; Hodgson et al., 2014; Laso-Jadart et al., 2017; Pierron et al., 2018; Triska et al., 2015).

We test for post-admixture selection along the entirety of chromosome 1. Figure 4 shows that all three methods detect an adaptive locus in the nearby region; the object detection approach is highly specific, returning a single bbox approximately centered on the adaptive locus (center is ~130 kb from truth), whereas the ancestry-outlier approach returns multiple nearby hits across ~48 Mb (outliers sum to ~6 Mb). *iDAT* finds one region as an outlier spanning ~12 Mb and not centered on the locus under selection. The nearby centromere may be extending the window that ancestry outlier detection identifies as under selection by repressing recombination. We generated the image of ancestry on Santiago using genetic distances so the object detection approach is less sensitive to recombination variation without needing to explicitly model recombination variation in the training data.

Notably, inference was conducted using the pre-trained baseline model whose demographic and genomic scenario differs from that in Cabo Verde. Specifically, the training model included 50% ancestry contributions from each source 50 generations ago; Santiago is estimated to have a 73% African ancestry contribution about 22 generations ago (Hamid et al., 2021; Korunes et al., 2022). We also trained on a 50 Mb window and applied the method to the whole ~250 Mb chromosome 1. Despite these substantial differences, the method performs well, suggesting it can be used widely for populations without well-studied demographic histories. Further, leveraging the general applicability of the baseline model, we made the pre-trained baseline model available online at [https://huggingface.co/spaces/imanhamid/ObjectDetection\\_AdmixtureSelection\\_Space](https://huggingface.co/spaces/imanhamid/ObjectDetection_AdmixtureSelection_Space) (see Data and Code Availability). Users can upload an image of painted chromosomes and quickly use the pre-trained set to get inferred adaptation under our method.

In this example, we used genetic recombination distance rather than physical distance. To consider how this choice impacts inference, we generated an image from the Cabo Verde ancestry calls for chromosome 1, but we used physical distance rather than genetic distance. Then, we uploaded that image to the online app with the pretrained data. The model predicts a single bounding box corresponding to physical positions 134,370,749 - 148,191,519. For reference, Duffy-null is at physical position 159,174,683 in this genome build (GRCh37). The center of the bbox is ~18Mb away from Duffy-null. This suggests longer tracts spanning the centromere are affecting the model's ability to localize the selection signal surrounding the Duffy-null allele. That is, when using physical distance, the model detects a region nearby but less localized to a site under selection, likely owing to recombination interference from the centromere. Therefore, for the purpose of applying this method to real data, users can consider training a model using relevant recombination maps for their system. Alternatively, for reasonably strong performance, users can do as we did here, and generate images using genetic map when inferring with a model that was trained using a uniform recombination map.

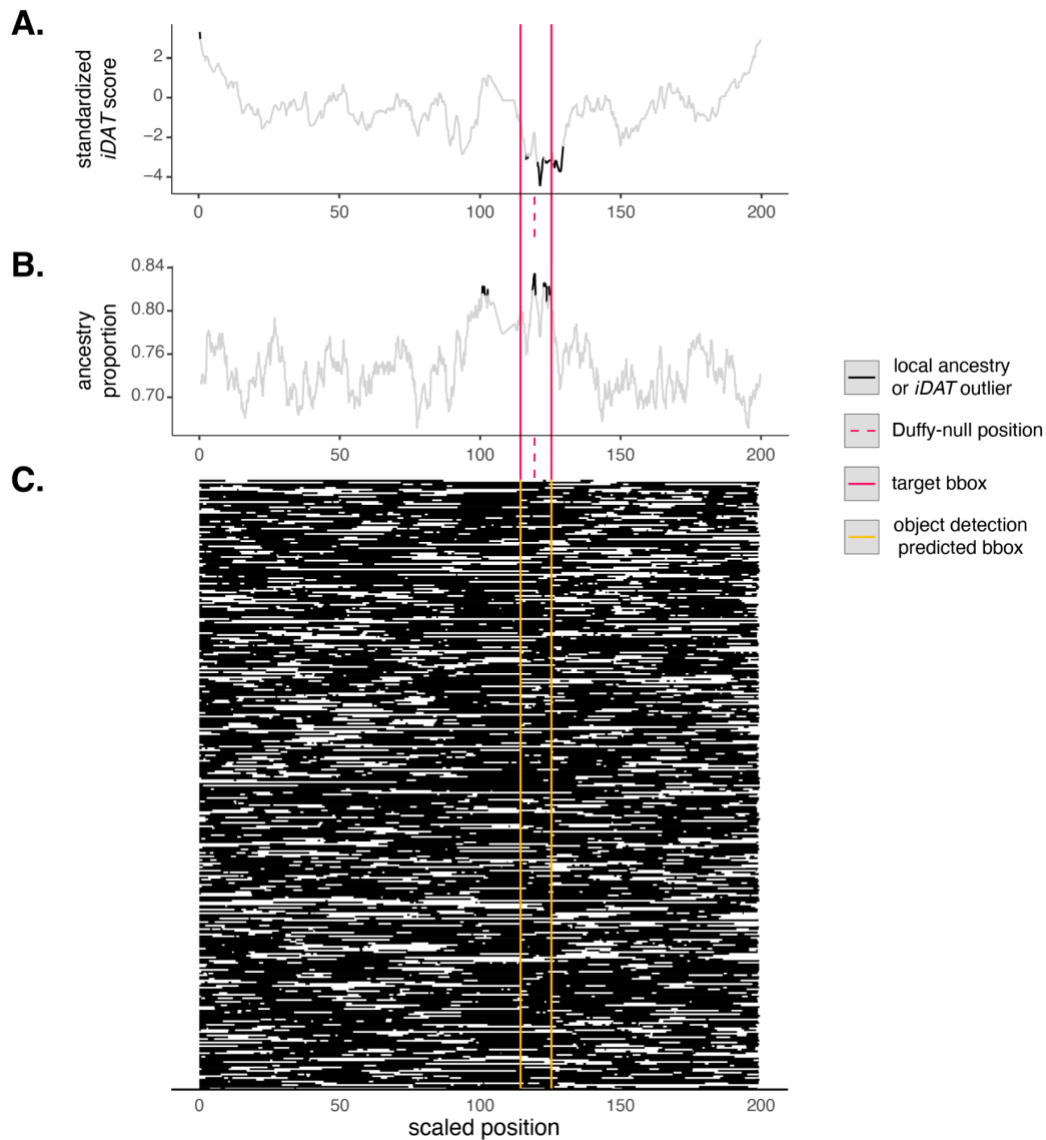

350

351

352

353

354

355

356

357

358

359

360

**Figure 4.** Identification of a known adaptive allele in a human population using multiple ancestry-based methods. We compare multiple methods to detect a well-known example of post-admixture positive selection in the admixed human populations from Santiago, Cabo Verde on the Duffy-null allele protective against *P. vivax* malaria (Hamid et al., 2021). (A) *iDAT* from Hamid et al., 2021, (B) ancestry outlier detection using a 3 standard deviation cutoff, and (C) the object detection approach developed in this paper. African ancestry in black and European ancestry in white. The image represents the entirety of chromosome 1 for 172 individuals. The dashed line indicates the position of the adaptive allele. The inferred bbox using object detection (C) is in yellow, closely matching the true bbox centered on the adaptive allele (red) in size and location. The other two methods infer multiple and/or longer regions as potentially under selection.

## Discussion

We developed a deep learning object detection strategy to detect and localize within the genome post-admixture positive selection based on images of chromosomes painted by local genetic ancestry. Our results demonstrate the power gained when including spatial patterns of ancestry beyond single locus summary statistics, and emphasize the need for further development of methods tailored to populations that do not fit the expectations of classical population genetics methods.

Our object detection approach can leverage complex local ancestry patterns without discarding information about the surrounding genomic context or requiring user choice of statistics. Using simulated and empirical human genetic data from Cabo Verde, we show that our framework better localizes the adaptive locus to a narrower genomic window and is less prone to false positives compared to common ancestry outlier approaches (Figures 3, 4). We expect many empirical examples to actually perform better than this case study because admixture is so recent (~22 generations) and strong ( $s = 0.08$  from Hamid et al., 2021) with ~73% admixture contributions from the source with the adaptive allele, which together produce extremely long stretches of African ancestry often spanning the entirety of chromosome 1 reminiscent of the poor performance observed in Table 2 for  $m = 0.9$ . In both simulated data and our empirical example, the object detection approach remains generally effective at identifying selection even when we misspecify aspects of demographic history such as admixture proportion, admixture timing, and population size trajectory. That is, we expect strong performance on empirical data even without knowing the full details of an admixed population's history. The size of the window that our method identifies will depend on the chromosome size, input image size, and choice of bbox size used in training. It may indeed be possible to identify a narrower window for a small chromosome, a larger image, or if we train with smaller target boxes. The midpoint of the bbox is a reasonable metric for a point estimate for the location of the adaptive locus.

Despite the overall strong performance of the method, we note several potential pitfalls and areas where future work could make this type of approach more generalizable. A primary barrier to effective implementation is the availability and accuracy of local ancestry calls. As with all ancestry-based approaches, such as ancestry outlier scans, local ancestry calling is a necessary prerequisite for this method. Many tools exist to infer local ancestry along admixed chromosomes, including recent developments for samples in which it is difficult to confidently call genotypes because of low or sparse coverage (Schaefer et al., 2016; Schaefer et al., 2017; Schumer et al., 2020; Wall et al., 2016). Still, local ancestry calling remains potentially challenging, especially in nonmodel systems, and the quality of local ancestry estimates often depends on reference dataset availability and the degree of differentiation between source populations. Notably, we tested our object detection strategy using phased ancestry haplotypes, and further work is needed to address the effects of phase errors. Phasing accuracy can be sensitive to factors such as the availability of reference panels, the number of unrelated individuals present in the sample, and the choice of phasing method (Browning & Browning, 2011). The extent of the impact will vary by species, and empirical tests suggest phasing error is minor in humans (Belsare et al. 2019). The pixel structure that combines multiple loci per pixel may smooth over some of the impact of errors at short stretches of base pairs. We recommend that researchers hoping to take ancestry-based approaches to detecting selection first confirm the validity of their local ancestry calls, for example by first simulating admixed haplotypes from genomes representing proxies for source populations and testing local ancestry assignment accuracy (Schumer et al., 2020; Williams, 2016). Though local ancestry calling is necessary, the similar performance of the object detection method in the high resolution and low-resolution ancestry scenarios demonstrates the utility of our method for a variety of organisms or situations where a limited set of markers are available for assigning local ancestry. Compared to local ancestry outlier approaches, our method may include a potential loss of information or resolution from binning many sites into much fewer possible pixels. However, the selected locus is unlikely to be near the edge of an ancestry tract,

406 and we focus on selection within the last ~100 generations or less; therefore, we expect tracts to be quite long  
407 and regions prone to binning error (i.e. edges) constitute a small proportion of the overall tract length. If  
408 resolution is a concern, researchers can consider testing different image sizes or genomic window sizes as  
409 well.

410 Ancestry-based methods such as the one presented here that leverage long stretches of higher than  
411 expected frequency are well-suited to detect selection on short timescales; we focus on history within a couple  
412 hundred generations after admixture and selection onset. For admixture more than a few hundred generations  
413 old, the length of ancestry tracts will decay due to recombination over time. As local ancestry at distant sites is  
414 decoupled over generations, detectable signatures of long ancestry tracts or high ancestry proportion in a large  
415 genomic region surrounding a variant under selection are less likely. Therefore, ancestry-based approaches  
416 are better suited for detecting post-admixture selection on the scale of tens to hundreds of generations since  
417 admixture. The optimal detection time frame (in generations) will depend both on strength of selection and the  
418 timing and proportion of admixture. When admixture is older, assuming selection occurs immediately post-  
419 admixture, there has been more time for ancestry tract lengths and frequencies to diverge between neutral and  
420 selected sites. That is, recombination has had time to break up ancestry tracts in neutral regions, while the  
421 ancestry tracts remain longer in the selected region. So, ancestry-based methods such as ours may perform  
422 slightly better for older admixture scenarios (Table 2 & Figure S1). However, this increase in accuracy is true  
423 only until a point: if enough time has passed or the selected allele has fixed, the haplotypes decay such that  
424 detection of sites under selection becomes more difficult.

425 Many of the methods we consider in this study, including the object detection method presented here,  
426 use the length of ancestry tracts to detect selection. This signature is influenced by the recombination  
427 landscape. We demonstrated the impact of one type of recombination nonuniformity, centromere  
428 interference, in the empirical example from Cabo Verde. Notably, the impact was different for the common  
429 local ancestry outlier approach, *iDAT*, and our object detection method. Local ancestry outlier approaches may  
430 have increased false positives and poorer localization if selection occurs in a low recombination region as local  
431 ancestry proportions are impacted at wider distances surrounding a selected variant. The recombination  
432 landscape will also affect *iDAT* because the statistic is based on the length of tracts in one genomic region  
433 compared to others, so the statistic risks both false positives and false negatives when using physical  
434 distances. Incorporating genetic map distances into *iDAT* may decrease some of the impact, but this approach  
435 has not been tested and may not improve localization. Under the object detection method, if one uses genetic  
436 map distances to generate images as done here, the recombination landscape has less of an influence on  
437 performance. We further demonstrated this in our example for detecting selection at Duffy-null in Cabo Verde  
438 wherein we compared localization using genetic map distances versus physical distance. We saw worse  
439 localization using physical distance owing to the nearby centromere decreasing the recombination rate in the  
440 region.

441 Our empirical example also showed the utility of using our pre-trained model available online, even if  
442 the model is misspecified. A central choice that users make is the size of the chromosomal window to include  
443 in the 200-pixel image. One can consider whole chromosomes, as we did in our empirical example of Cabo  
444 Verde, or partial chromosomes, similar to our example with multiple selected sites. In this study, we tested our  
445 model on chromosomes ranging from 50-250Mb. Depending on the population, study system, and the size of  
446 the chromosomal region included in the image, the 11-pixel bbox will correspond to a different number of  
447 SNPs. The ideal size therefore will depend on the study question and selection history of the population, and  
448 there may be a tradeoff between the ability to localize a narrower genomic region and the potential loss of  
449 information if signatures of selection unable to be captured in too small of a window.

450 Our empirical example used human genetic data, though post-admixture selection has been observed  
451 across a range of organisms. The baseline model scenario is fairly general and not organism specific. For  
452 example, the uniform recombination rate used is reasonable for *Anopheles* mosquitoes and humans (though  
453 their overall recombination landscapes differ substantially, the mean rate is similar), and the range of  
454 chromosome sizes used in inference (50-250Mb) covers a wide range of organisms. However, the accuracy of  
455 local ancestry calls may be impacted by the availability of high-quality reference datasets as proxies for source  
456 populations. Available references vary by population and organism, so this could preclude applicability of our  
457 method for specific study systems.

458 Our use of out-of-the box object detection frameworks demonstrates that population genetics  
459 researchers can apply deep learning applications without prior experience with machine learning techniques.  
460 We required only ~1.5 hours to train the object detection method on 8000 images. To train on 800 images, it  
461 only took ~15 minutes with comparably high performance (~90% of selected variants detected vs ~95% with  
462 more training examples), making optimization and troubleshooting on small training sets possible in a  
463 reasonable timeframe before scaling up to a larger final dataset. That is, one may consider using a smaller  
464 training set for optimization of window size and other model decisions prior to training on a larger set.  
465 Additionally, with the availability of free GPU access via platforms such as Google Colab, deep learning  
466 methodology is accessible to researchers without the means or desire to buy their own GPU or pay for access  
467 to a remote server. The same training set can be used for multiple regions of the genome and for multiple  
468 populations given the limited impact of model misspecification. More generally, the success of our approach  
469 suggests that researchers should consider object detection methods for other problems in detecting selection  
470 and population genetics.

## Materials and Methods

### Simulations

Simulated data were generated with the forward simulator SLiM 3, combined with tree-sequence recording to track and assign local ancestry (Haller et al., 2019; Haller & Messer, 2019). For our baseline scenario, we considered a single-pulse admixture event between two source populations (Figure 1). One source population was fixed for a beneficial mutation randomly placed along a 50 Mb chromosome, with selection strength drawn from a uniform distribution ranging from 0 to 0.5. The newly admixed population had a population size  $N$  of 10000, with 50% ancestral contribution from each source. That is, the range of  $N$ s is in [0,5000]. Tree sequence files were output after 50 generations. We used a dominance coefficient of 0.5 (an additive model), recombination rate was set to a probability of a crossover of  $1.3 \times 10^{-8}$  between adjacent basepairs per gamete. The SLiM script for our baseline model is available on github ([https://github.com/agoldberglab/ObjectDetection\\_AdmixtureSelection/blob/main/admixture.slim](https://github.com/agoldberglab/ObjectDetection_AdmixtureSelection/blob/main/admixture.slim))

### Ancestry Image Generation

For each simulation, we used *tskit* to read the tree sequence files and extract local ancestry information for 200 sampled chromosomes from 100 diploid individuals from the admixed population (Haller et al., 2019; Kelleher et al., 2016, 2018). We then used *R* to generate a black and white 200x200 pixel image of the entire set of sampled chromosomes for each simulation (y-axis representing sampled chromosomes, x-axis representing genomic position), with each position colored by local ancestry for that individual chromosome. In these images, “black” represented ancestry from the source population that was fixed for the beneficial mutation, and “white” represented the other source population. That is, each pixel usually contains many sites depending on the length of the chromosome one uses. We chose 200 pixels for convenience, but other sizes could work. Larger images will take up more computational resources for storage and training.

For our high resolution, or full ancestry images, we used true local ancestry at every position. For our low-resolution ancestry images, we used the same simulations but instead only assigned local ancestry at 100 randomly dispersed markers to generate images. We used the same internally consistent markers across all simulations from the same demographic model. This approach to assigning local ancestry allowed us to test the model performance for scenarios where we have only a few Ancestry Informative Markers (AIMs) for population(s) of interest.

### Object detection model architecture and training

We implemented an object detection model using the IceVision computer vision framework (v0.5.2; <https://airctic.com/0.5.2/>). Specifically, we trained a FasterRCNN model (Ren et al., 2016) ([https://airctic.com/0.5.2/model\\_faster\\_rcnn/](https://airctic.com/0.5.2/model_faster_rcnn/)) with the FastAI deep learning framework (built on PyTorch; <https://docs.fast.ai/>). We used a resnet18 backbone and pretrained model weights from ImageNet (<https://image-net.org/>).

For the sets of high- and low-resolution ancestry images described above, we generated 8000 images for training and 2000 images for validation from the same demographic model. In object detection models, the goal is to predict a bounding box around an object of interest. Under the IceVision framework, the bounding box is set as [x-min, y-min, x-max, y-max]. In our case, our goal is to detect the position of the selected variant (if there is one). Thus, for each image in our training and validation sets, we defined the target bounding box as an 11-pixel-wide window centered on the selected variant. For example, if the selected variant is in x-axis position 155, the bounding box was defined as [150, 0, 161, 200].



517 We trained each model for 30 epochs using the *learn.fine\_tune* function, freezing the pretrained layers  
518 for one epoch. We used a base learning rate of  $3 \times 10^{-3}$  and a weight decay of  $1 \times 10^{-2}$ .

519  
520 We largely use an out-of-the-box FasterRCNN architecture with preselected hyperparameters; base  
521 learning rate & weight decay were based on testing a few different values and picking the one with the best  
522 overall performance. Number of epochs was based on the tradeoff between time to train and gain in validation  
523 performance.

524  
525 The high resolution and low-resolution ancestry models were both trained on an NVIDIA GeForce RTX  
526 2080 Ti GPU. The time to train one model was approximately 1.5 hours.

### 527 **Bounding box size and genomic resolution**

528 The method can work on other bounding box sizes, however one would need to train a model on their  
529 desired bounding box size. As a proof of concept, we retrained a small set (800 training images from our  
530 original training set, 200 validation images from our original validation set) to detect bboxes 5 pixels wide,  
531 centered on the variant under selection. We then inferred on the remaining 9000 images from our original  
532 training and validation sets. We still see reasonably high performance with this smaller bbox size (~86% of  
533 variants detected within a bounding box, Precision = 0.768, recall = 0.756) (Supplemental Table 1). Training on  
534 more images should improve this performance.

535  
536  
537 Alternatively, if researchers wanted higher resolution (i.e. narrower windows), it is likely simpler use a  
538 smaller chunk of the chromosome to generate images rather than retrain the entire model to your desired  
539 window size.

### 540 **Detection threshold**

541 The model essentially is performing a classification task that identifies bboxes, and then returns a  
542 probability that that bbox actually contains a selected variant. This probability is defined as the bbox score,  
543 which can be interpreted as the model's level of confidence in that predicted bbox. By default, the model will  
544 only return a predicted bbox if the score is above 0.5. This is the detection threshold. Users can alter the  
545 detection threshold to return bboxes above any arbitrary score (i.e. make the threshold higher if one wants only  
546 higher confidence predictions, lower if one wants to increase recall at the risk of lower precision). We used the  
547 default detection threshold of 0.5 for all performance evaluations, except in the case of Precision-Recall  
548 Curves (and AUC). For those, we calculated PR over a range of 10000 detection thresholds from 0 to 1.  
549 Detection threshold can be set during inference by adding the argument to the *predict\_dl()* function in  
550 IceVision, or directly in our demo app via the slider input.

### 551 **Validation**

552  
553 We evaluated performance on the validation sets using several metrics. We first calculated precision  
554 and recall by defining each x-axis pixel position as an independent test. Each image target had 11 true  
555 positives (the size of the bbox, ideally centered on the adaptive allele +/- 5 pixels) and 189 negatives. That is,  
556 pixels within the true bbox are all labeled as positive and pixels outside the true bbox are labeled as negative.  
557 Because some images may have multiple predicted bboxes, and the sizes of these bboxes can vary, the  
558 predicted positives and predicted negatives can be greater than or less than 1 for each pixel. For the purpose  
559 of getting a single classification for each pixel, if a pixel was predicted within the x-min and x-max of any  
560 bounding box with a score above the threshold, it was classified as a "region under selection" (i.e. a "positive"  
561 classification). X-axis positions outside all predicted bounding boxes were classified as a "region not under  
562 selection" (i.e. a "negative" classification). In this way, we were able to calculate true and false positives and  
563

negatives. We defined P-R in this manner to capture multiple aspects of the method's performance such as how well it identifies a bbox of the correct size in the correct region.

We also defined several other metrics to assist in evaluating object detection performance across different demographic scenarios. First, we calculated the proportion of predicted bounding boxes that contain the true selected variant, which we defined as the bbox detection rate. We chose this metric because some images have more than one predicted bounding box, and some have none. We wanted to correctly punish the model for returning bboxes that did not contain a selected variant. For example, if the model predicts two bboxes for an image, one which correctly contains the selected variant within the bounds, and a second which does not, the method is not performing as well as we would like. A value close to 1 indicates high sensitivity, or that the method is consistently able to detect a region under selection.

We also calculated the average width of the predicted bounding boxes. If the average width is much wider than the 11-pixels we used in training, this may indicate we have low specificity to detect a region under selection. Finally, we calculated the average number of predicted bounding boxes per image. Since we are only simulating one variant under selection, the model should predict 1 bounding box per image. These metrics combined with the more universal precision and recall statistics allowed us to compare performance of our model across different scenarios and between different methods.

Code to calculate metrics during both training and inference is found in our github example notebook ([https://github.com/agoldberglab/ObjectDetection\\_AdmixtureSelection/blob/6fa95b941608292d219585b1bd8b8dec9c315dce/objectdetection\\_ancestryimages\\_example.ipynb](https://github.com/agoldberglab/ObjectDetection_AdmixtureSelection/blob/6fa95b941608292d219585b1bd8b8dec9c315dce/objectdetection_ancestryimages_example.ipynb)).

## Model Misspecifications

We tested the performance of our baseline high resolution ancestry model under several demographic model misspecifications (Results & Table 2). For each misspecification scenario, we generated 1000 high resolution full ancestry images (i.e. incorporating full local ancestry information), ran inference using our trained baseline model, and calculated performance metrics detailed in the previous section.

For these simulations, we followed the baseline scenario described previously while changing one feature of the admixture or population history. We tested inference on images generated from different admixture contributions than what we trained on (10%, 25%, 75% or 90% contribution from the source population providing the beneficial mutation), number of generations since admixture began (25 and 100 generations), population size histories (expansion, contraction, and moderate (50%) and severe (10%) bottlenecks), and a scenario where the selected variant is present in both sources at a frequency of 0.5 (i.e.  $F_{ST}$  of 0 between the sources).

For the population size misspecifications, the expansion (200%) or contraction (50%) events occurred at 25 generations (halfway through the simulation). The bottlenecks occurred at 25 generations and lasted for 10 generations before expanding to the original population size of 10000. All scenarios start with  $N=10000$ .

## Comparison to local ancestry outlier approach

We generated 1000 'genome-wide' simulations of 5 independently segregating chromosomes of 50 Mb each. For each simulation, the beneficial allele was fixed at the center of the first chromosome. The rest of the simulation followed exactly the admixture scenario for our baseline model described previously. After sampling 200 haplotypes from the population, we binned the first chromosome into 200 equally-sized windows (to be analogous with the 200x200 pixel images for comparison). Any window with an average local ancestry

611 proportion greater than 3 standard deviations from the genome-wide mean was classified as “under selection”  
612 by this outlier approach. We generated ancestry-painted images from the same simulated chromosomes and  
613 classified regions under selection using our object detection method trained on the baseline high resolution  
614 ancestry scenario.

### 615 **Application to human SNP data from Cabo Verde**

616 We used local ancestry calls for ~800k genome-wide SNPs from a previous study of post-admixture  
617 selection in Cabo Verde, which included 172 individuals from the island of Santiago (Beleza et al., 2013;  
618 Hamid et al., 2021). We focused on Santiago because we had previously detected evidence of strong positive  
619 selection in this population for the Duffy-null allele at the *DARC* (also known as *ACKR1*) gene. We generated a  
620 200x200 pixel image of West African and European ancestry tracts on Chromosome 1 for these 172  
621 individuals (344 haplotypes). The length of ancestry tracts can be influenced by the recombination landscape  
622 along the chromosome (e.g. long ancestry tracts are often found close to the centromere). To account for this  
623 effect, we used genetic map distances rather than physical positions to calculate ancestry tract lengths, and  
624 suggest this approach for others using our method if a genetic map is available. We then identified regions  
625 under selection on Chromosome 1 using our pre-trained high resolution object detection method for the  
626 baseline ancestry scenario (Figure 4).  
627

628  
629 To compare our results to the local ancestry outlier approach, we identified sites where the proportion  
630 of individuals with West African ancestry was more than 3 standard deviations from the mean genome-wide  
631 ancestry proportion (~0.73).  
632

633 We also compared our results to the calculated *iDAT* values from Hamid et al. 2021 (the full genome-  
634 wide *iDAT* scores can also be downloaded from Hamid et al.’s associated github repository). This data consists  
635 of *iDAT* values for 10,000 randomly sampled SNPs across the genome. *iDAT* is a summary statistic designed  
636 to detect ancestry-specific post-admixture selection by calculating the difference in the rate of tract length  
637 decay between two ancestries at a site of interest, similar to how *iHS* compares the decay in homozygosity  
638 between haplotypes bearing the ancestral and derived alleles at a focal site (Voight et al., 2006). Duffy-null  
639 was previously shown to be in a genomic window with extreme values of *iDAT* in Santiago, indicative of the  
640 strong recent positive selection at the locus. For our purposes, we first standardized *iDAT* by the genome-wide  
641 background. Then, we identified standardized *iDAT* values on Chromosome 1 that were more than 3 standard  
642 deviations from the mean genome-wide standardized *iDAT*.  
643

644 **Acknowledgements:** This work was supported by National Institutes of Health R35GM133481 to AG,  
645 R35GM138286 to DRS, and F32GM139313 to KLK. We thank Alejandro Ochoa for valuable feedback. We  
646 thank Hua Tang and Greg Barsh for generating genetic data used in this study, and the individuals from Cabo  
647 Verde for their participation.

648 **Data and Code Availability:** Code for this study is available at  
649 [https://github.com/agoldberglab/ObjectDetection\\_AdmixtureSelection](https://github.com/agoldberglab/ObjectDetection_AdmixtureSelection). The pretrained high resolution baseline  
650 model that was used for most analyses in this study is uploaded and deployed at  
651 [https://huggingface.co/spaces/imanhamid/ObjectDetection\\_AdmixtureSelection\\_Space](https://huggingface.co/spaces/imanhamid/ObjectDetection_AdmixtureSelection_Space). Here, users can input  
652 a 200x200 pixel, black and white, ancestry-painted image and the model will return vertices and scores for  
653 bboxes centered on predicted regions under selection (if there are any). We recommend that users follow the  
654 example code in our github for generating ancestry images to ensure that files are in the correct format. We  
655 emphasize that this model is trained under a simple single-locus selection scenario, so users should use  
656 discretion when deciding if this is an appropriate method for their data. Inferred local ancestry information for

657 the individuals from Cabo Verde can be found at <https://doi.org/10.5281/zenodo.4021277>, originally published  
658 by Hamid et al. 2021 from genotype data published in Beleza et al. 2013.

## References

- 660 Adrion, J. R., Galloway, J. G., & Kern, A. D. (2020). Predicting the landscape of recombination using deep  
661 learning. *Molecular biology and evolution*, 37(6), 1790-1808.
- 662 Aguillon, S. M., Dodge, T. O., Preising, G. A., & Schumer, M. (2022). Introgression. *Current Biology*, 32(16),  
663 R865-R868.
- 664 Battey, C. J., Ralph, P. L., & Kern, A. D. (2020). Predicting geographic location from genetic variation with  
665 deep neural networks. *eLife*, 9, e54507.
- 666 Battey, C. J., Coffing, G. C., & Kern, A. D. (2021). Visualizing population structure with variational  
667 autoencoders. *G3*, 11(1), jkaa036.
- 668 Beleza, S., Johnson, N. A., Candille, S. I., Absher, D. M., Coram, M. A., Lopes, J., et al. (2013). Genetic  
669 architecture of skin and eye color in an African-European admixed population. *PLoS genetics*, 9(3),  
670 e1003372.
- 671 Belsare, S., Levy-Sakin, M., Mostovoy, Y., Durinck, S., Chaudhuri, S., Xiao, M., et al. (2019). Evaluating the  
672 quality of the 1000 genomes project data. *BMC genomics*, 20(1), 1-14.
- 673 Bhatia, G., Tandon, A., Patterson, N., Aldrich, M. C., Ambrosone, C. B., Amos, C., Bandera, E. V., Berndt, S.  
674 I., Bernstein, L., Blot, W. J., Bock, C. H., Caporaso, N., Casey, G., Deming, S. L., Diver, W. R.,  
675 Gapstur, S. M., Gillanders, E. M., Harris, C. C., Henderson, B. E., et al. (2014). Genome-wide Scan of  
676 29,141 African Americans Finds No Evidence of Directional Selection since Admixture. *The American  
677 Journal of Human Genetics*, 95(4), 437–444. <https://doi.org/10.1016/j.ajhg.2014.08.011>
- 678 Blischak, P. D., Barker, M. S., & Gutenkunst, R. N. (2021). Chromosome-scale inference of hybrid speciation  
679 and admixture with convolutional neural networks. *Molecular Ecology Resources*, 21(8), 2676–2688.  
680 <https://doi.org/10.1111/1755-0998.13355>
- 681 Browning, S. R., & Browning, B. L. (2011). Haplotype phasing: Existing methods and new developments.  
682 *Nature Reviews Genetics*, 12(10), 703–714. <https://doi.org/10.1038/nrg3054>
- 683 Bryc, K., Auton, A., Nelson, M. R., Oksenberg, J. R., Hauser, S. L., Williams, S., Froment, A., Bodo, J.-M.,  
684 Wambebe, C., Tishkoff, S. A., & Bustamante, C. D. (2010). Genome-wide patterns of population  
685 structure and admixture in West Africans and African Americans. *Proceedings of the National Academy  
686 of Sciences*, 107(2), 786–791. <https://doi.org/10.1073/pnas.0909559107>
- 687 Bryc, K., Durand, E. Y., Macpherson, J. M., Reich, D., & Mountain, J. L. (2015). The Genetic Ancestry of  
688 African Americans, Latinos, and European Americans across the United States. *The American Journal  
689 of Human Genetics*, 96(1), 37–53. <https://doi.org/10.1016/j.ajhg.2014.11.010>
- 690 Busby, G. B., Band, G., Si Le, Q., Jallow, M., Bougama, E., Mangano, V. D., Amenga-Etego, L. N., Enimil, A.,  
691 Apinjoh, T., Ndila, C. M., Manjurano, A., Nyirongo, V., Doumba, O., Rockett, K. A., Kwiatkowski, D. P.,  
692 Spencer, C. C., & Malaria Genomic Epidemiology Network. (2016). Admixture into and within sub-  
693 Saharan Africa. *ELife*, 5, e15266. <https://doi.org/10.7554/eLife.15266>
- 694 Busby, G., Christ, R., Band, G., Leffler, E., Le, Q. S., Rockett, K., Kwiatkowski, D., & Spencer, C. (2017).  
695 Inferring adaptive gene-flow in recent African history. *BioRxiv*, 205252. <https://doi.org/10.1101/205252>
- 696 Chan, J., Perrone, V., Spence, J. P., Jenkins, P. A., Mathieson, S., & Song, Y. S. (2018). A Likelihood-Free  
697 Inference Framework for Population Genetic Data using Exchangeable Neural Networks. *Advances in  
698 Neural Information Processing Systems*, 31, 8594–8605.
- 699 Corbett-Detig, R., & Nielsen, R. (2017). A hidden Markov model approach for simultaneously estimating local  
700 ancestry and admixture time using next generation sequence data in samples of arbitrary ploidy. *PLoS  
701 genetics*, 13(1), e1006529.
- 702 Cuadros-Espinoza, S., Laval, G., Quintana-Murci, L., & Patin, E. (2022). The genomic signatures of natural  
703 selection in admixed human populations. *The American Journal of Human Genetics*, 109(4), 710-726.
- 704 Edelman, N. B., & Mallet, J. (2021). Prevalence and adaptive impact of introgression. *Annual Review of  
705 Genetics*, 55, 265-283.
- 706 Fernandes, V., Brucato, N., Ferreira, J. C., Pedro, N., Cavadas, B., Ricaut, F.-X., Alshamali, F., & Pereira, L.  
707 (2019). Genome-Wide Characterization of Arabian Peninsula Populations: Shedding Light on the  
708 History of a Fundamental Bridge between Continents. *Molecular Biology and Evolution*, 36(3), 575–  
709 586. <https://doi.org/10.1093/molbev/msz005>
- 710 Flagel, L., Brandvain, Y., & Schrider, D. R. (2019). The Unreasonable Effectiveness of Convolutional Neural

- 711 Networks in Population Genetic Inference. *Molecular Biology and Evolution*, 36(2), 220–238.  
712 <https://doi.org/10.1093/molbev/msy224>
- 713 Gopalan, S., Smith, S. P., Korunes, K., Hamid, I., Ramachandran, S., & Goldberg, A. (2022). Human genetic  
714 admixture through the lens of population genomics. *Philosophical Transactions of the Royal Society B*,  
715 377(1852), 20200410.
- 716 Gower, G., Picazo, P. I., Fumagalli, M., & Racimo, F. (2021). Detecting adaptive introgression in human  
717 evolution using convolutional neural networks. *ELife*, 10, e64669. <https://doi.org/10.7554/eLife.64669>
- 718 Gravel, S., Stephens, M., & Pritchard, J. K. (2012). Population genetics models of local ancestry. *Genetics*,  
719 191(2), 607–619. <https://doi.org/10.1534/genetics.112.139808>
- 720 Haller, B. C., Galloway, J., Kelleher, J., Messer, P. W., & Ralph, P. L. (2019). Tree-sequence recording in SLiM  
721 opens new horizons for forward-time simulation of whole genomes. *Molecular Ecology Resources*,  
722 19(2), 552–566. <https://doi.org/10.1111/1755-0998.12968>
- 723 Haller, B. C., & Messer, P. W. (2019). SLiM 3: Forward Genetic Simulations Beyond the Wright–Fisher Model.  
724 *Molecular Biology and Evolution*, 36(3), 632–637. <https://doi.org/10.1093/molbev/msy228>
- 725 Hamid, I., Korunes, K. L., Beleza, S., & Goldberg, A. (2021). Rapid adaptation to malaria facilitated by  
726 admixture in the human population of Cabo Verde. *ELife*, 10, e63177.  
727 <https://doi.org/10.7554/eLife.63177>
- 728 Hedrick, P. W. (2013). Adaptive introgression in animals: Examples and comparison to new mutation and  
729 standing variation as sources of adaptive variation. *Molecular Ecology*, 22(18), 4606–4618.  
730 <https://doi.org/10.1111/mec.12415>
- 731 Hellenthal, G., Busby, G. B., Band, G., Wilson, J. F., Capelli, C., Falush, D., & Myers, S. (2014). A genetic atlas  
732 of human admixture history. *science*, 343(6172), 747–751.
- 733 Hodgson, J. A., Pickrell, J. K., Pearson, L. N., Quillen, E. E., Prista, A., Rocha, J., et al. (2014). Natural  
734 selection for the Duffy-null allele in the recently admixed people of Madagascar. *Proceedings of the*  
735 *Royal Society B: Biological Sciences*, 281(1789), 20140930.
- 736 Hsieh, P., Vollger, M. R., Dang, V., Porubsky, D., Baker, C., Cantsilieris, S., et al. (2019). Adaptive archaic  
737 introgression of copy number variants and the discovery of previously unknown human genes. *Science*,  
738 366(6463), eaax2083.
- 739 Huerta-Sánchez, E., Jin, X., Bianba, Z., Peter, B. M., Vinckenbosch, N., Liang, Y., et al. (2014). Altitude  
740 adaptation in Tibetans caused by introgression of Denisovan-like DNA. *Nature*, 512(7513), 194–197.
- 741 Isildak, U., Stella, A., & Fumagalli, M. (2021). Distinguishing between recent balancing selection and  
742 incomplete sweep using deep neural networks. *Molecular Ecology Resources*, 21(8), 2706–2718.  
743 <https://doi.org/10.1111/1755-0998.13379>
- 744 Isshiki, M., Naka, I., Kimura, R., Nishida, N., Furusawa, T., Natsuhara, K., Yamauchi, T., Nakazawa, M., Ishida,  
745 T., Inaoka, T., Matsumura, Y., Ohtsuka, R., & Ohashi, J. (2021). Admixture with indigenous people  
746 helps local adaptation: Admixture-enabled selection in Polynesians. *BMC Ecology and Evolution*, 21(1),  
747 179. <https://doi.org/10.1186/s12862-021-01900-y>
- 748 Jeong, C., Alkorta-Aranburu, G., Basnyat, B., Neupane, M., Witonsky, D. B., Pritchard, J. K., Beall, C. M., &  
749 Rienzo, A. D. (2014). Admixture facilitates genetic adaptations to high altitude in Tibet. *Nature*  
750 *Communications*, 5(1), 1–7. <https://doi.org/10.1038/ncomms4281>
- 751 Jin, W., Xu, S., Wang, H., Yu, Y., Shen, Y., Wu, B., & Jin, L. (2012). Genome-wide detection of natural  
752 selection in African Americans pre- and post-admixture. *Genome Research*, 22(3), 519–527.  
753 <https://doi.org/10.1101/gr.124784.111>
- 754 Kelleher, J., Etheridge, A. M., & McVean, G. (2016). Efficient Coalescent Simulation and Genealogical Analysis  
755 for Large Sample Sizes. *PLOS Computational Biology*, 12(5), e1004842.  
756 <https://doi.org/10.1371/journal.pcbi.1004842>
- 757 Kelleher, J., Thornton, K. R., Ashander, J., & Ralph, P. L. (2018). Efficient pedigree recording for fast  
758 population genetics simulation. *PLOS Computational Biology*, 14(11), e1006581.  
759 <https://doi.org/10.1371/journal.pcbi.1006581>
- 760 Kelly, J. K. (1997). A test of neutrality based on interlocus associations. *Genetics*, 146(3), 1197–1206.
- 761 Kern, A. D., & Schrider, D. R. (2018). diploS/HIC: An Updated Approach to Classifying Selective Sweeps. *G3:*  
762 *Genes, Genomes, Genetics*, 8(6), 1959–1970. <https://doi.org/10.1534/g3.118.200262>
- 763 Kim, Y., & Nielsen, R. (2004). Linkage Disequilibrium as a Signature of Selective Sweeps. *Genetics*, 167(3),  
764 1513–1524. <https://doi.org/10.1534/genetics.103.025387>

- 765 Korunes, K., Soares-Souza, G. B., Bobrek, K., Tang, H., Araújo, I. I., Goldberg, A., Belezza, S. (2022) Sex-  
766 biased admixture and assortative mating shape genetic variation and influence demographic inference  
767 in admixed Cabo Verdeans. *G3: Genes|Genomes|Genetics*, jkac183
- 768 Krizhevsky, A., Sutskever, I., & Hinton, G. E. (2012). ImageNet Classification with Deep Convolutional Neural  
769 Networks. *Advances in Neural Information Processing Systems*, 25.  
770 <https://papers.nips.cc/paper/2012/hash/c399862d3b9d6b76c8436e924a68c45b-Abstract.html>
- 771 Laso-Jadart, R., Harmant, C., Quach, H., Zidane, N., Tyler-Smith, C., Mehdi, Q., Ayub, Q., Quintana-Murci, L.,  
772 & Patin, E. (2017). The Genetic Legacy of the Indian Ocean Slave Trade: Recent Admixture and Post-  
773 admixture Selection in the Makranis of Pakistan. *The American Journal of Human Genetics*, 101(6),  
774 977–984. <https://doi.org/10.1016/j.ajhg.2017.09.025>
- 775 Lawson, D. J., Hellenthal, G., Myers, S., & Falush, D. (2012). Inference of population structure using dense  
776 haplotype data. *PLoS genetics*, 8(1), e1002453.
- 777 Lecun, Y., & Bengio, Y. (1995). Convolutional networks for images, speech, and time-series. In M. A. Arbib  
778 (Ed.), *The handbook of brain theory and neural networks*. MIT Press.
- 779 LeCun, Y., Bengio, Y., & Hinton, G. (2015). Deep learning. *Nature*, 521(7553), 436–444.  
780 <https://doi.org/10.1038/nature14539>
- 781 Lohmueller, K. E., Bustamante, C. D., & Clark, A. G. (2010). The Effect of Recent Admixture on Inference of  
782 Ancient Human Population History. *Genetics*, 185(2), 611–622.  
783 <https://doi.org/10.1534/genetics.109.113761>
- 784 Lohmueller, K. E., Bustamante, C. D., & Clark, A. G. (2011). Detecting Directional Selection in the Presence of  
785 Recent Admixture in African-Americans. *Genetics*, 187(3), 823–835.  
786 <https://doi.org/10.1534/genetics.110.122739>
- 787 Lopez, M., Choin, J., Sikora, M., Siddle, K., Harmant, C., Costa, H. A., Silvert, M., Mougouia-Daouda, P.,  
788 Hombert, J.-M., Froment, A., Le Bomin, S., Perry, G. H., Barreiro, L. B., Bustamante, C. D., Verdu, P.,  
789 Patin, E., & Quintana-Murci, L. (2019). Genomic Evidence for Local Adaptation of Hunter-Gatherers to  
790 the African Rainforest. *Current Biology*, 29(17), 2926-2935.e4.  
791 <https://doi.org/10.1016/j.cub.2019.07.013>
- 792 Maples, B. K., Gravel, S., Kenny, E. E., & Bustamante, C. D. (2013). RFMix: a discriminative modeling  
793 approach for rapid and robust local-ancestry inference. *The American Journal of Human Genetics*,  
794 93(2), 278-288.
- 795 Moran, B. M., Payne, C., Langdon, Q., Powell, D. L., Brandvain, Y., & Schumer, M. (2021). The genomic  
796 consequences of hybridization. *ELife*, 10, e69016.
- 797 Norris, E. T., Rishishwar, L., Chande, A. T., Conley, A. B., Ye, K., Valderrama-Aguirre, A., & Jordan, I. K.  
798 (2020). Admixture-enabled selection for rapid adaptive evolution in the Americas. *Genome Biology*,  
799 21(1), 29. <https://doi.org/10.1186/s13059-020-1946-2>
- 800 Norris, L. C., Main, B. J., Lee, Y., Collier, T. C., Fofana, A., Cornel, A. J., & Lanzaro, G. C. (2015). Adaptive  
801 introgression in an African malaria mosquito coincident with the increased usage of insecticide-treated  
802 bed nets. *Proceedings of the National Academy of Sciences*, 112(3), 815–820.  
803 <https://doi.org/10.1073/pnas.1418892112>
- 804 Oziolor, E. M., Reid, N. M., Yair, S., Lee, K. M., Guberman VerPloeg, S., Bruns, P. C., et al. (2019). Adaptive  
805 introgression enables evolutionary rescue from extreme environmental pollution. *Science*, 364(6439),  
806 455-457.
- 807 Patin, E., Lopez, M., Grollemund, R., Verdu, P., Harmant, C., Quach, H., Laval, G., Perry, G. H., Barreiro, L.  
808 B., Froment, A., Heyer, E., Massougbodji, A., Fortes-Lima, C., Migot-Nabias, F., Bellis, G., Dugoujon,  
809 J.-M., Pereira, J. B., Fernandes, V., Pereira, L., et al. (2017). Dispersals and genetic adaptation of  
810 Bantu-speaking populations in Africa and North America. *Science*, 356(6337), 543–546.  
811 <https://doi.org/10.1126/science.aal1988>
- 812 Payseur, B. A., & Rieseberg, L. H. (2016). A genomic perspective on hybridization and speciation. *Molecular*  
813 *ecology*, 25(11), 2337-2360.
- 814 Pierron, D., Heiske, M., Razafindrazaka, H., Pereda-loth, V., Sanchez, J., Alva, O., Arachiche, A., Boland, A.,  
815 Olasso, R., Deleuze, J.-F., Ricaut, F.-X., Rakotoarisoa, J.-A., Radimilahy, C., Stoneking, M., & Letellier,  
816 T. (2018). Strong selection during the last millennium for African ancestry in the admixed population of  
817 Madagascar. *Nature Communications*, 9(1), 1–9. <https://doi.org/10.1038/s41467-018-03342-5>
- 818 Price, A. L., Weale, M. E., Patterson, N., Myers, S. R., Need, A. C., Shianna, K. V., Ge, D., Rotter, J. I., Torres,

- 819 E., Taylor, K. D., Goldstein, D. B., & Reich, D. (2008). Long-Range LD Can Confound Genome Scans  
820 in Admixed Populations. *The American Journal of Human Genetics*, 83(1), 132–135.  
821 <https://doi.org/10.1016/j.ajhg.2008.06.005>
- 822 Racimo, F., Sankararaman, S., Nielsen, R., & Huerta-Sánchez, E. (2015). Evidence for archaic adaptive  
823 introgression in humans. *Nature Reviews Genetics*, 16(6), 359–371. <https://doi.org/10.1038/nrg3936>
- 824 Racimo, F., Marnetto, D., & Huerta-Sánchez, E. (2017). Signatures of archaic adaptive introgression in  
825 present-day human populations. *Molecular biology and evolution*, 34(2), 296–317.
- 826 Ren, S., He, K., Girshick, R., & Sun, J. (2016). Faster R-CNN: Towards Real-Time Object Detection with  
827 Region Proposal Networks. *ArXiv:1506.01497 [Cs]*. <http://arxiv.org/abs/1506.01497>
- 828 Rishishwar, L., Conley, A. B., Wigington, C. H., Wang, L., Valderrama-Aguirre, A., & Jordan, I. K. (2015).  
829 Ancestry, admixture and fitness in Colombian genomes. *Scientific Reports*, 5(1), 1–16.  
830 <https://doi.org/10.1038/srep12376>
- 831 Sabeti, P. C., Reich, D. E., Higgins, J. M., Levine, H. Z. P., Richter, D. J., Schaffner, S. F., Gabriel, S. B.,  
832 Platko, J. V., Patterson, N. J., McDonald, G. J., Ackerman, H. C., Campbell, S. J., Altshuler, D.,  
833 Cooper, R., Kwiatkowski, D., Ward, R., & Lander, E. S. (2002). Detecting recent positive selection in  
834 the human genome from haplotype structure. *Nature*, 419(6909), 832–837.  
835 <https://doi.org/10.1038/nature01140>
- 836 Sanchez, T., Cury, J., Charpiat, G., & Jay, F. (2021). Deep learning for population size history inference:  
837 Design, comparison and combination with approximate Bayesian computation. *Molecular Ecology*  
838 *Resources*, 21(8), 2645–2660. <https://doi.org/10.1111/1755-0998.13224>
- 839 Schaefer, N. K., Shapiro, B., & Green, R. E. (2016). Detecting hybridization using ancient DNA. *Molecular*  
840 *ecology*, 25(11), 2398–2412.
- 841 Schaefer, N. K., Shapiro, B., & Green, R. E. (2017). AD-LIBS: inferring ancestry across hybrid genomes using  
842 low-coverage sequence data. *BMC bioinformatics*, 18(1), 1–22.
- 843 Schrider, D. R., & Kern, A. D. (2018). Supervised Machine Learning for Population Genetics: A New Paradigm.  
844 *Trends in Genetics*, 34(4), 301–312. <https://doi.org/10.1016/j.tig.2017.12.005>
- 845 Schumer, M., Powell, D. L., & Corbett-Detig, R. (2020). Versatile simulations of admixture and accurate local  
846 ancestry inference with mixnmatch and ancestryinfer. *Molecular Ecology Resources*, 20(4), 1141–1151.  
847 <https://doi.org/10.1111/1755-0998.13175>
- 848 Setter, D., Mousset, S., Cheng, X., Nielsen, R., DeGiorgio, M., & Hermisson, J. (2020). VolcanoFinder:  
849 genomic scans for adaptive introgression. *PLoS Genetics*, 16(6), e1008867.
- 850 Shchur, V., Svedberg, J., Medina, P., Corbett-Detig, R., & Nielsen, R. (2020). On the distribution of tract  
851 lengths during adaptive introgression. *G3: Genes, Genomes, Genetics*, 10(10), 3663–3673.
- 852 Sheehan, S., & Song, Y. S. (2016). Deep Learning for Population Genetic Inference. *PLOS Computational*  
853 *Biology*, 12(3), e1004845. <https://doi.org/10.1371/journal.pcbi.1004845>
- 854 Svedberg, J., Shchur, V., Reinman, S., Nielsen, R., & Corbett-Detig, R. (2021). Inferring adaptive introgression  
855 using hidden Markov models. *Molecular biology and evolution*, 38(5), 2152–2165.
- 856 Tang, H., Choudhry, S., Mei, R., Morgan, M., Rodriguez-Cintron, W., Burchard, E. G., & Risch, N. J. (2007).  
857 Recent Genetic Selection in the Ancestral Admixture of Puerto Ricans. *The American Journal of*  
858 *Human Genetics*, 81(3), 626–633. <https://doi.org/10.1086/520769>
- 859 Torada, L., Lorenzon, L., Beddis, A., Isildak, U., Pattini, L., Mathieson, S., & Fumagalli, M. (2019). ImaGene: A  
860 convolutional neural network to quantify natural selection from genomic data. *BMC Bioinformatics*,  
861 20(9), 337. <https://doi.org/10.1186/s12859-019-2927-x>
- 862 Triska, P., Soares, P., Patin, E., Fernandes, V., Cerny, V., & Pereira, L. (2015). Extensive Admixture and  
863 Selective Pressure Across the Sahel Belt. *Genome Biology and Evolution*, 7(12), 3484–3495.  
864 <https://doi.org/10.1093/gbe/evv236>
- 865 Vicuña, L., Klimenkova, O., Norambuena, T., Martinez, F. I., Fernandez, M. I., Shchur, V., & Eyheramendy, S.  
866 (2020). Post-Admixture Selection on Chileans Targets Haplotype Involved in Pigmentation and Immune  
867 Defense Against Pathogens. *Genome Biology and Evolution*. <https://doi.org/10.1093/gbe/evaa136>
- 868 Voight, B. F., Kudaravalli, S., Wen, X., & Pritchard, J. K. (2006). A Map of Recent Positive Selection in the  
869 Human Genome. *PLOS Biology*, 4(3), e72. <https://doi.org/10.1371/journal.pbio.0040072>
- 870 Wall, J. D., Schlebusch, S. A., Alberts, S. C., Cox, L. A., Snyder-Mackler, N., Nevonen, K. A., et al. (2016).  
871 Genomewide ancestry and divergence patterns from low-coverage sequencing data reveal a complex  
872 history of admixture in wild baboons. *Molecular ecology*, 25(14), 3469–3483.



- 873 Wang, Z., Wang, J., Kourakos, M., Hoang, N., Lee, H. H., Mathieson, I., & Mathieson, S. (2021). Automatic  
874 inference of demographic parameters using generative adversarial networks. *Molecular Ecology*  
875 *Resources*, 21(8), 2689–2705. <https://doi.org/10.1111/1755-0998.13386>  
876 Whitney, K. D., Randell, R. A., & Rieseberg, L. H. (2006). Adaptive Introgression of Herbivore Resistance  
877 Traits in the Weedy Sunflower *Helianthus annuus*. *The American Naturalist*, 167(6), 794–807.  
878 <https://doi.org/10.1086/504606>  
879 Williams, A. (2016). admix-simu: Admix-simu: program to simulate admixture between multiple populations.  
880 Zenodo. <https://doi.org/10.5281/zenodo.45517>  
881 Yelmen, B., Marnetto, D., Molinaro, L., Flores, R., Mondal, M., & Pagani, L. (2021). Improving selection  
882 detection with population branch statistic on admixed populations. *Genome biology and evolution*,  
883 13(4), evab039.  
884 Zhou, Q., Zhao, L., & Guan, Y. (2016). Strong Selection at MHC in Mexicans since Admixture. *PLOS Genetics*,  
885 12(2), e1005847. <https://doi.org/10.1371/journal.pgen.1005847>  
886

887

888

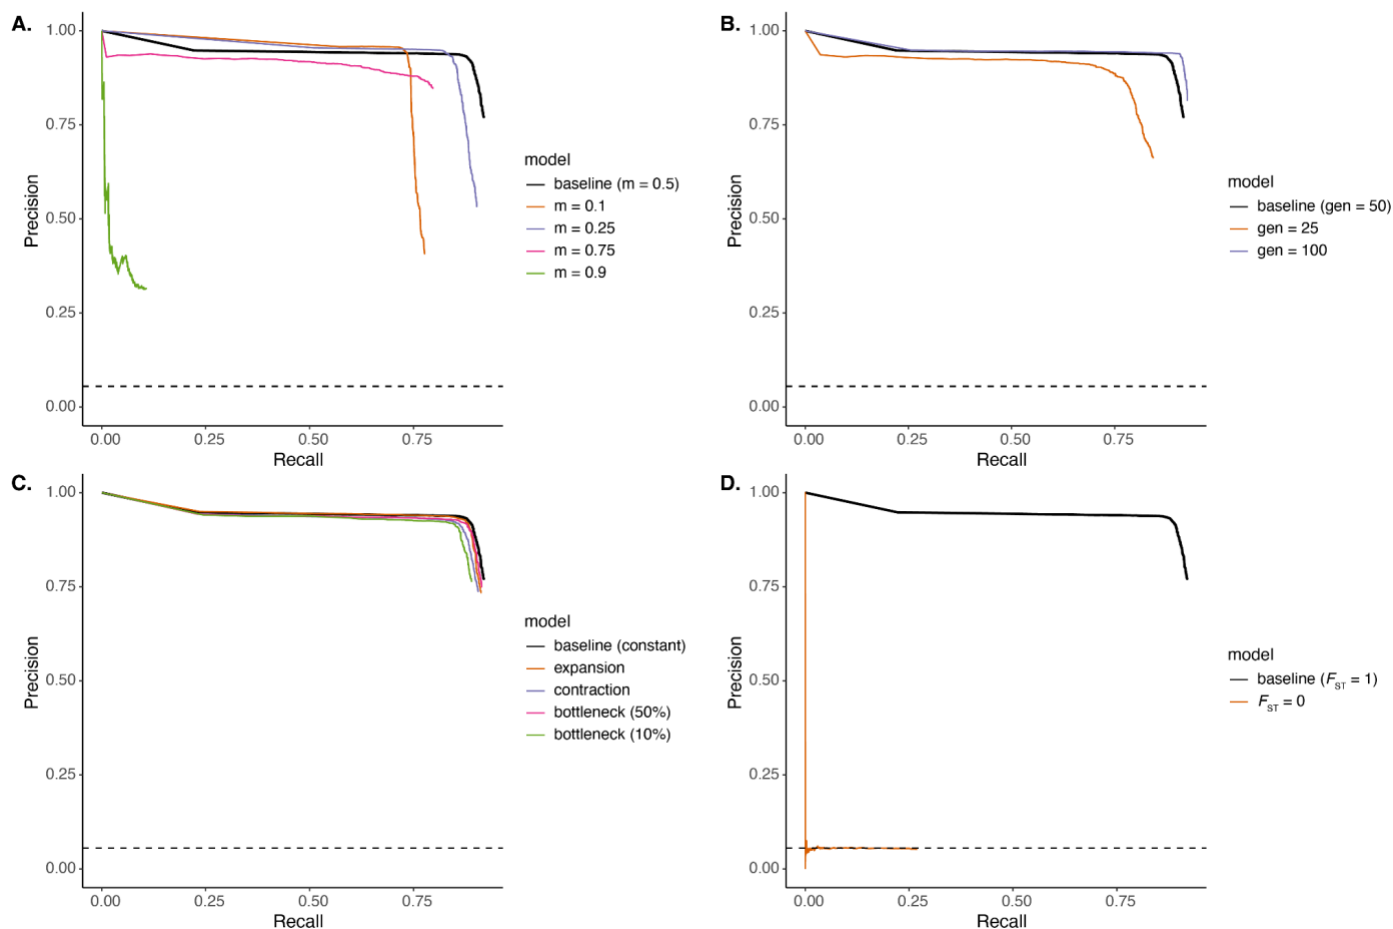

889

890

**Supplemental Figure 1.** Precision-Recall curves comparing performance under demographic model misspecifications to the baseline scenario for high resolution full ancestry images; baseline is the solid black line in each plot. Panels show different categories of misspecification: A) founding admixture contribution from the population providing the beneficial allele, B) number of generations since admixture occurred, C) population size change since the founding of the admixed populations, and D) level of differentiation between the source populations for the variant under selection. Area under the curves (AUC) can be found in Table 2. The no-skill classifier is indicated by the dashed black lines in each plot.

896

897

898

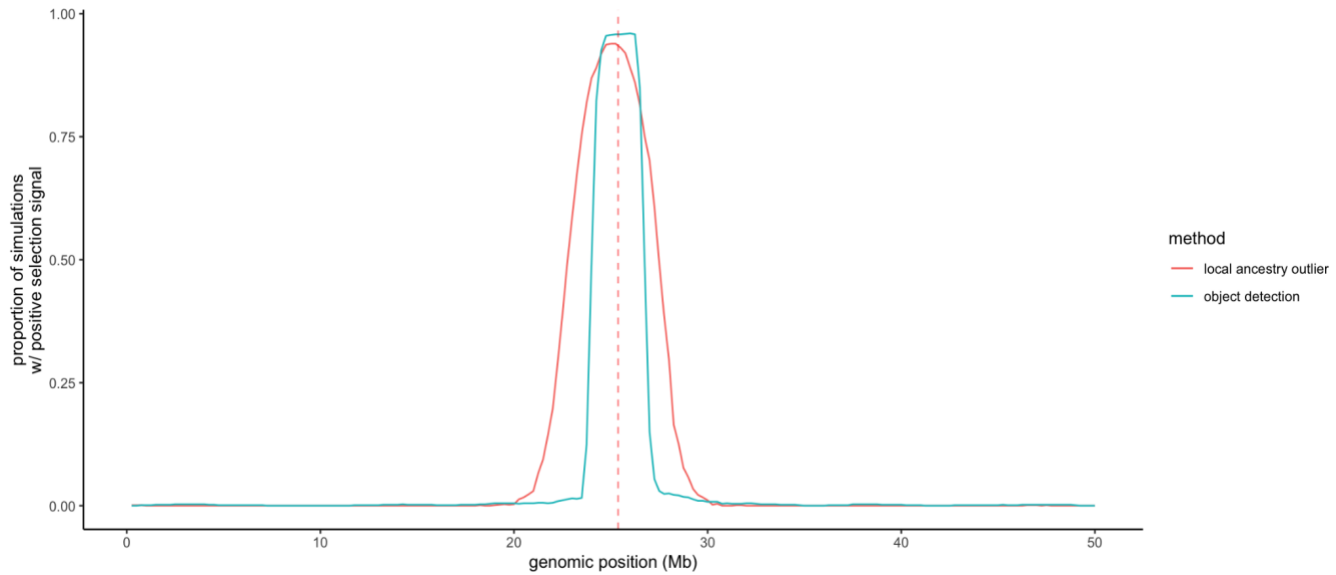

899  
900  
901  
902  
903  
904

**Supplemental Figure 2.** Comparison of local ancestry outlier approach and object detection method. Replot of data from Figure 3A, showing, for each genomic window, the proportion of simulations that had that region classified as “under selection” by either the object detection or local ancestry outlier methods.

905

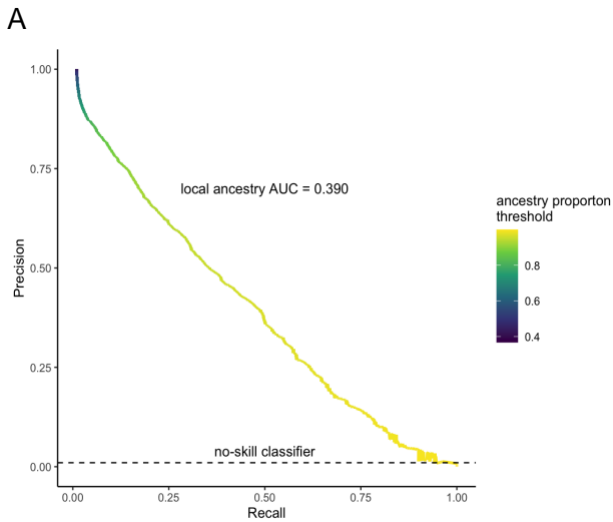

906

907

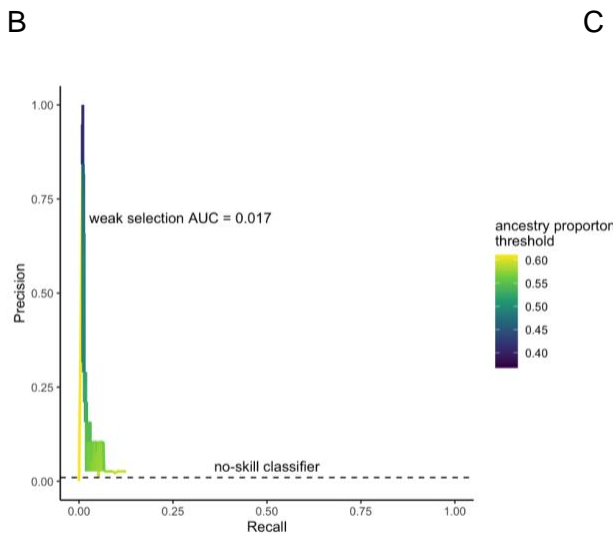

C

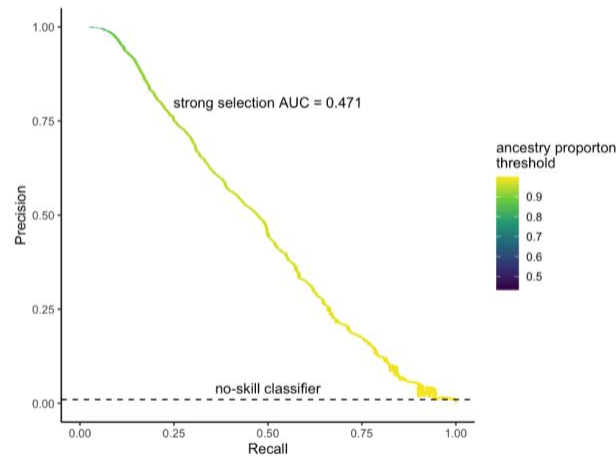

908

909

910

911

912

913

914

915

916

917

918

**Supplemental Figure 3.** Alternative measure of performance of local ancestry outlier approach. We used the same simulations that were generated for Figure 3 over a range of selection coefficients. We defined the “prediction score” as the ancestry proportion, and calculated PR over the range of local ancestry proportions (~0.367 to ~1). Because the “selected variant” is at the very edge of the 100th window, we labeled both windows 100 and 101 as “positives” and everything else as negatives. (A) across selection coefficients. (B) Splitting into “weak selection” simulations ( $s < 0.01$ ,  $n = 3800$  [200 windows for 19 simulations]) and (C) “strong selection” simulations ( $s > 0.1$ ),  $n = 162600$  [200 windows for 813 simulations]). Evaluating performance in this way punishes the local ancestry method more than Figure 3 because the wide affected region with high ancestry proportion results in low recall over a range of outlier “thresholds.”

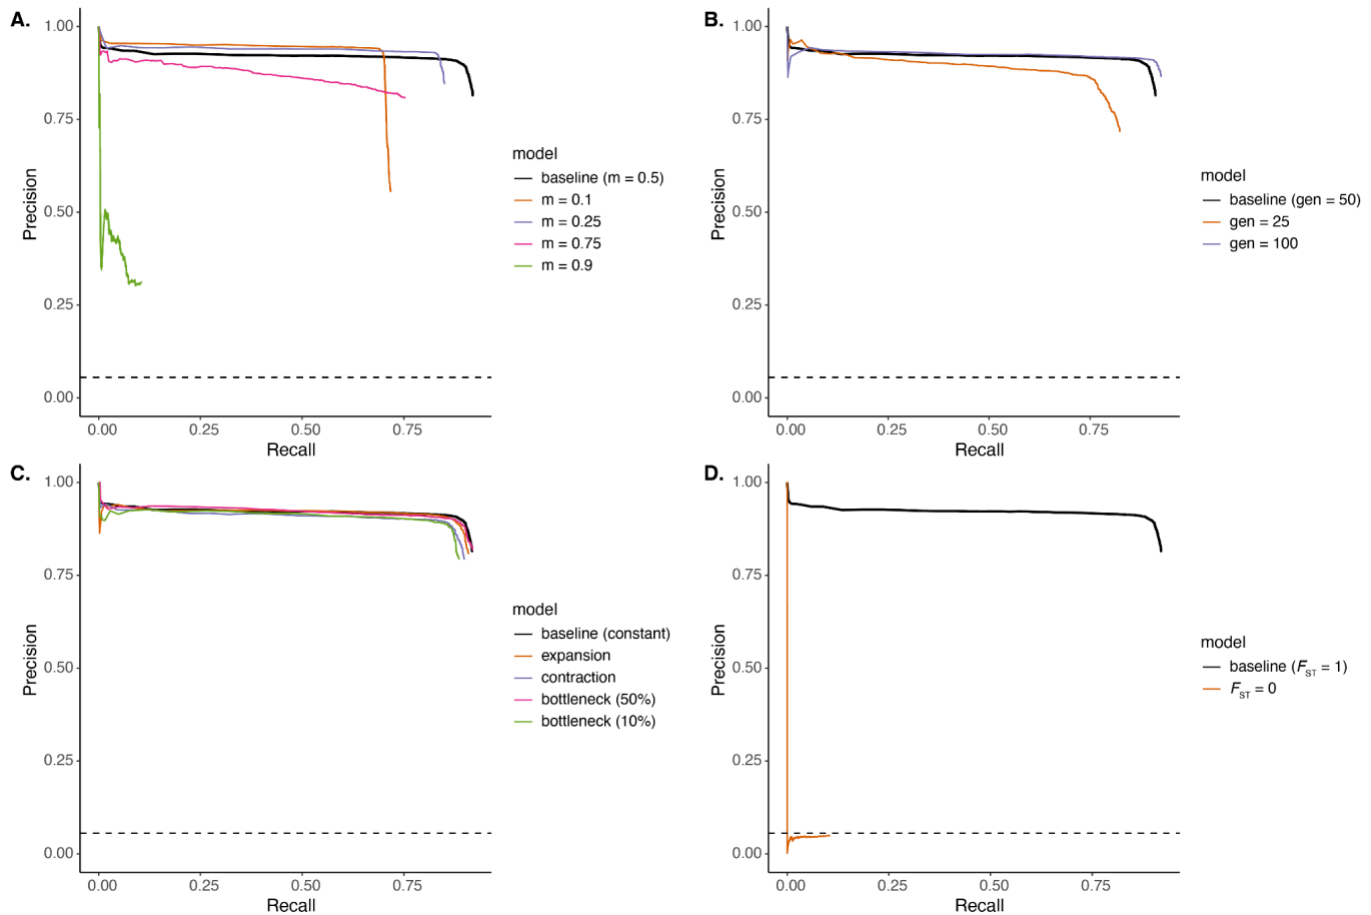

919  
920 **Supplemental Figure 4.** Precision-Recall curves comparing performance under demographic model  
921 misspecifications to the baseline scenario (i.e. the scenario that the network was trained on) for low-resolution  
922 ancestry resolution images; baseline is the solid black line in each plot. Panels show different categories of  
923 misspecification: A) founding admixture contribution from the population providing the beneficial allele, B)  
924 number of generations since admixture occurred, C) population size change since the founding of the admixed  
925 populations, and D) level of differentiation between the source populations for the variant under selection. Area  
926 under the curves (AUC) can be found in Table S2. The no-skill classifier is indicated by the dashed black lines  
927 in each plot. Analogous to Figure S1 for high-resolution ancestry.  
928  
929

| <b>ancestry resolution</b> | <b>bbox detection rate</b> | <b>average width</b>             | <b>average number of bounding boxes</b> | <b>precision</b> | <b>recall</b> |
|----------------------------|----------------------------|----------------------------------|-----------------------------------------|------------------|---------------|
| high (full ancestry)       | 0.861                      | 4.956<br>(var: 0.264,<br>n=8561) | 1.033<br>(var: 0.160,<br>n = 9000)      | 0.768            | 0.756         |

**Supplemental Table 1.** Performance of object detection method with a smaller 5-pixel bbox using 800 training images and 200 validation images.

930  
931  
932

933  
934

**Supplemental Table 2.** Performance of object detection method on images generated from demographic misspecifications for low resolution ancestry. Further details of models in Materials and Methods, Figure S4.

| misspecification | bbox detection rate | average width                  | average number of bounding boxes | precision | recall | AUC   |
|------------------|---------------------|--------------------------------|----------------------------------|-----------|--------|-------|
| none (baseline)  | 0.950               | 10.834 (var = 0.580, n = 1964) | 1.0175 (var = 0.064, n = 2000)   | 0.867     | 0.870  | 0.811 |
| m = 0.1          | 0.723               | 10.778 (var = 0.793, n = 824)  | 0.895 (var = 0.283, n = 1000)    | 0.786     | 0.675  | 0.649 |
| m = 0.25         | 0.857               | 10.819 (var = 0.649, n = 862)  | 0.872 (var = 0.135, n = 1000)    | 0.922     | 0.798  | 0.764 |
| m = 0.75         | 0.788               | 10.843 (var = 0.638, n = 839)  | 0.841 (var = 0.138, n = 1000)    | 0.821     | 0.690  | 0.630 |
| m = 0.9          | 0.073               | 10.994 (var = 0.080, n = 194)  | 0.194 (var = 0.156, n = 1000)    | 0.332     | 0.065  | 0.040 |
| gen = 25         | 0.860               | 10.823 (var = 0.597, n = 946)  | 0.987 (var = 0.119, n = 1000)    | 0.793     | 0.768  | 0.711 |
| gen = 100        | 0.970               | 10.786 (var = 0.805, n = 993)  | 1.012 (var = 0.038, n = 1000)    | 0.886     | 0.887  | 0.827 |
| Fst = 0          | 0.032               | 10.867 (var = 0.271, n = 635)  | 1.073 (var = 1.080, n = 1000)    | 0.047     | 0.042  | 0.004 |
| bottleneck (50%) | 0.947               | 10.857 (var = 0.491, n = 988)  | 1.037 (var = 0.094, n = 1000)    | 0.853     | 0.868  | 0.812 |
| bottleneck (10%) | 0.931               | 10.846 (var = 0.524, n = 989)  | 1.022 (var = 0.062, n = 1000)    | 0.835     | 0.842  | 0.774 |
| expansion        | 0.939               | 10.823 (var = 0.632, n = 984)  | 1.028 (var = 0.081, n = 1000)    | 0.856     | 0.863  | 0.802 |
| contraction      | 0.938               | 10.873 (var = 0.419, n = 984)  | 1.016 (var = 0.068, n = 1000)    | 0.847     | 0.848  | 0.785 |

935
